# Supplementary material for: Mechanochemical Studies on Coupling of Hydrazines and Hydrazine Amides with Phenolic and Furanyl Aldehydes—Hydrazones with Antileishmanial and Antibacterial Activities
Source: MDPI journal article supplement (doi:10.3390/molecules28135284), 2023-07-07
Supplement: s1 [file s1]

## Supplementary Materials

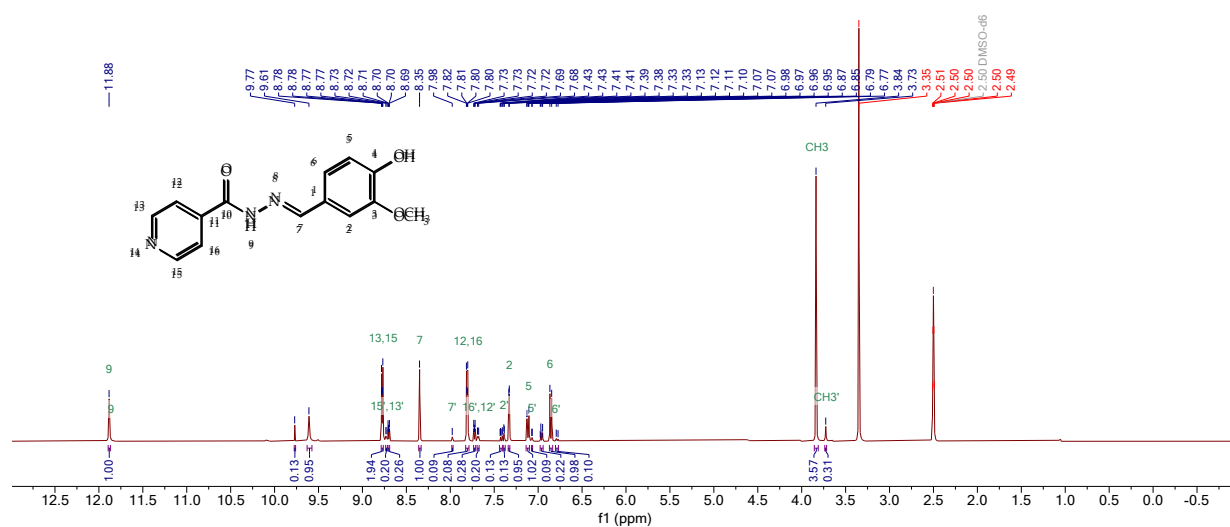

**Figure S1:**  $^1\text{H}$  NMR (400 MHz, DMSO- $d_6$ , 298 K) of compound **1**

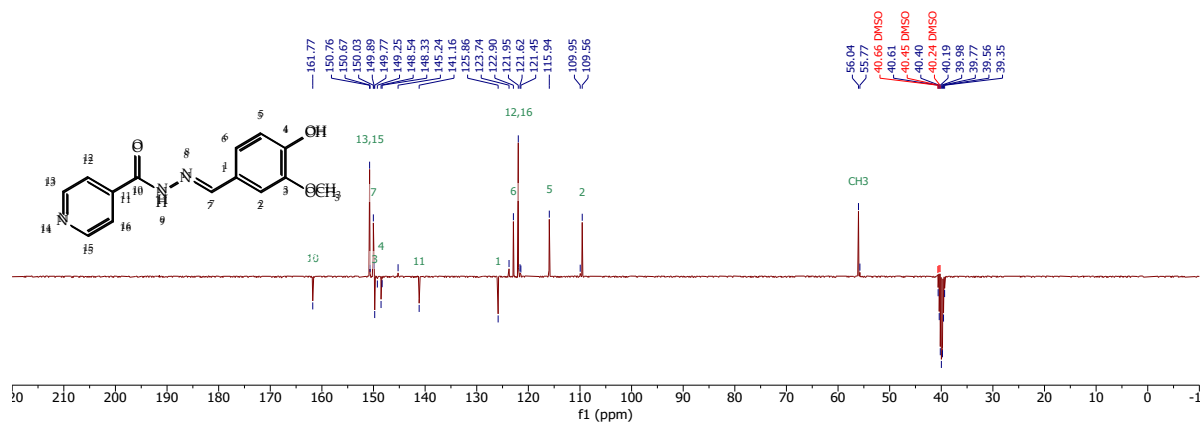

**Figure S2:**  $^{13}\text{C}$  NMR (100 MHz, DMSO- $d_6$ , 298 K) of compound **1**

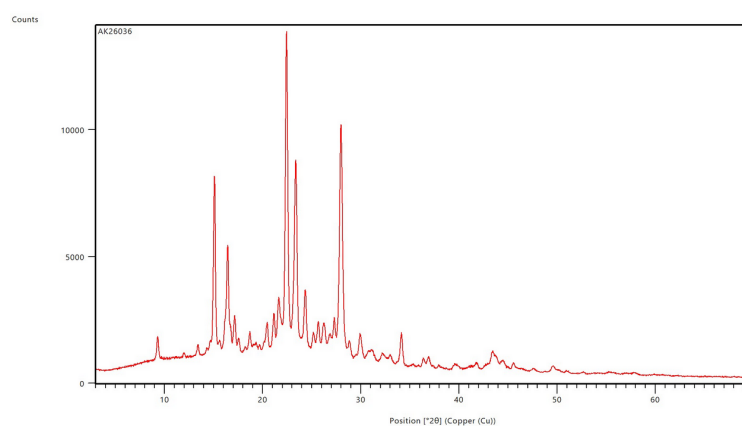

**Figure S3:** Powder XRD of compound **1**

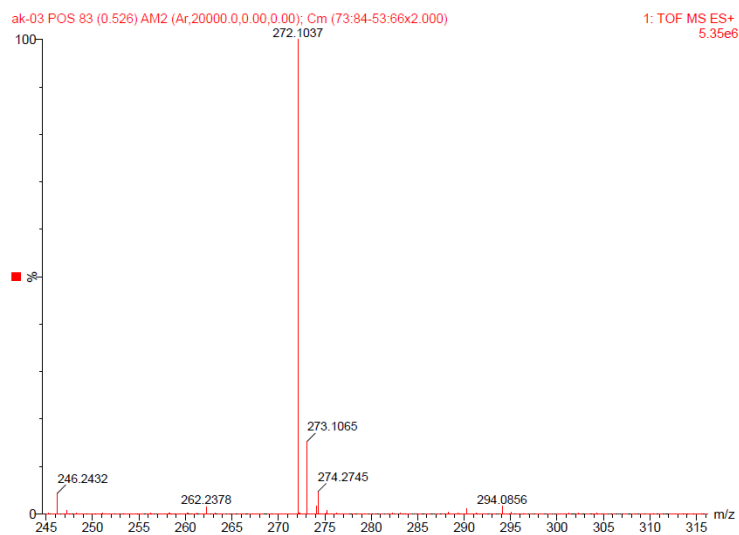

Figure S4: HRMS of compound 1

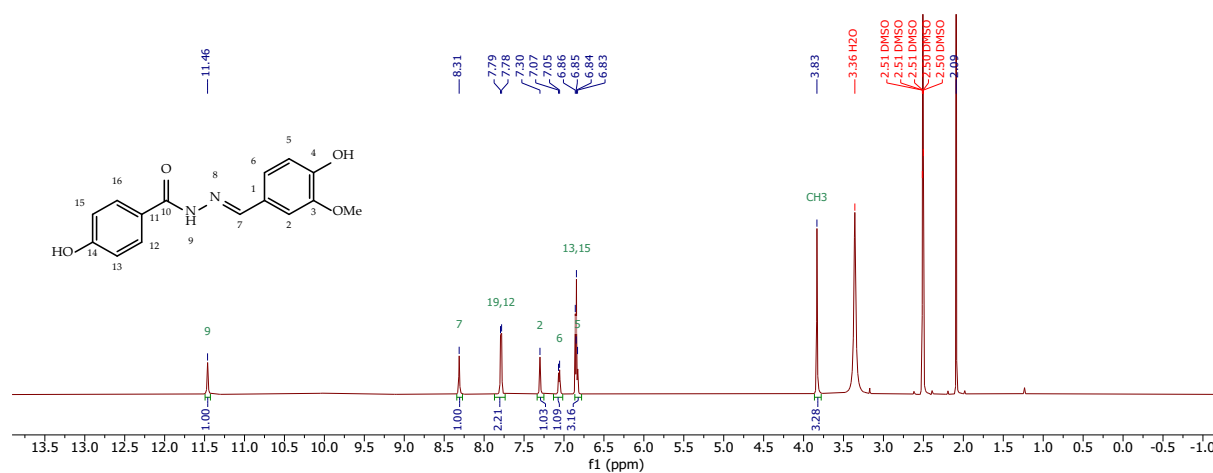

Figure S5: <sup>1</sup>H NMR (600 MHz, DMSO-d<sub>6</sub>, 298 K) of compound 2

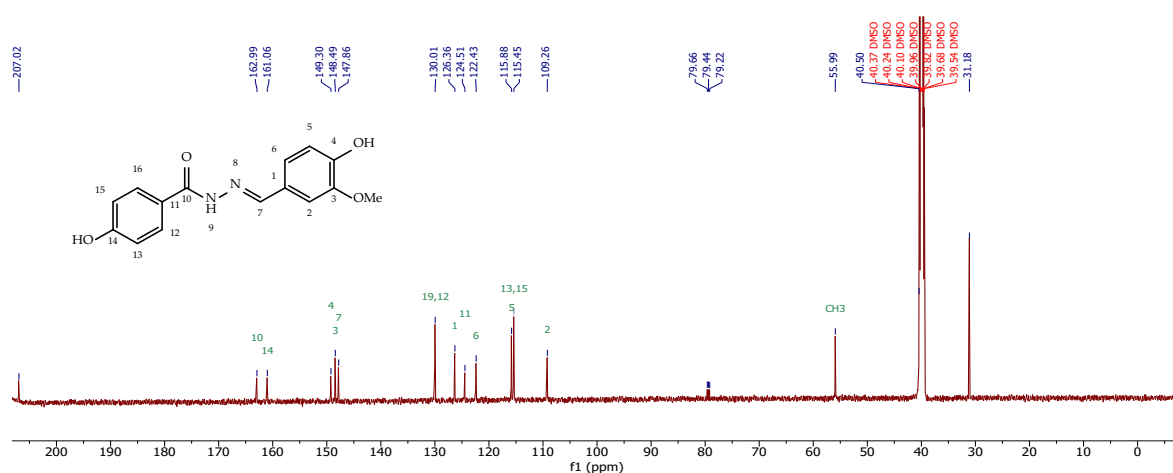

Figure S6: <sup>13</sup>C NMR (150 MHz, DMSO-d<sub>6</sub>, 298 K) of compound 2

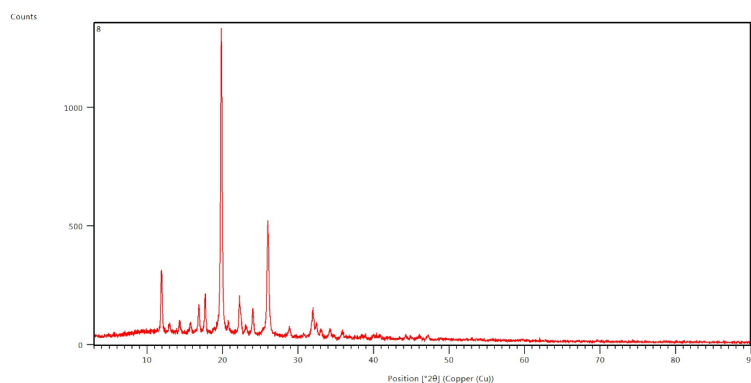

**Figure S7:** Powder XRD of compound **2**

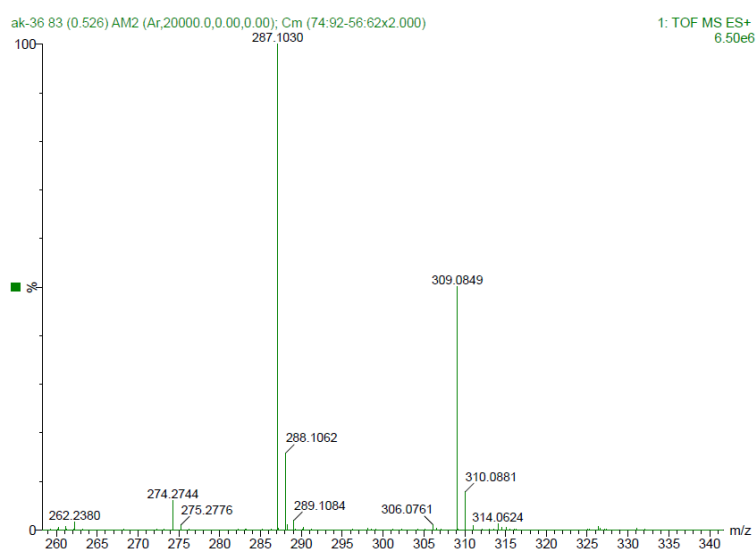

**Figure S8:** HRMS of compound **2**

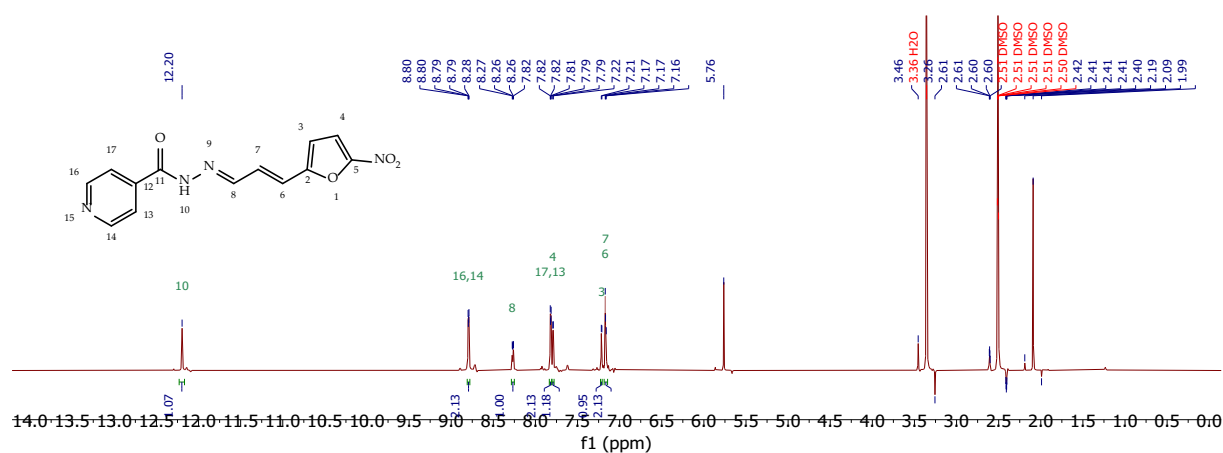

**Figure S9:**  $^1\text{H}$  NMR (600 MHz, DMSO- $d_6$ , 298 K) of compound **3**

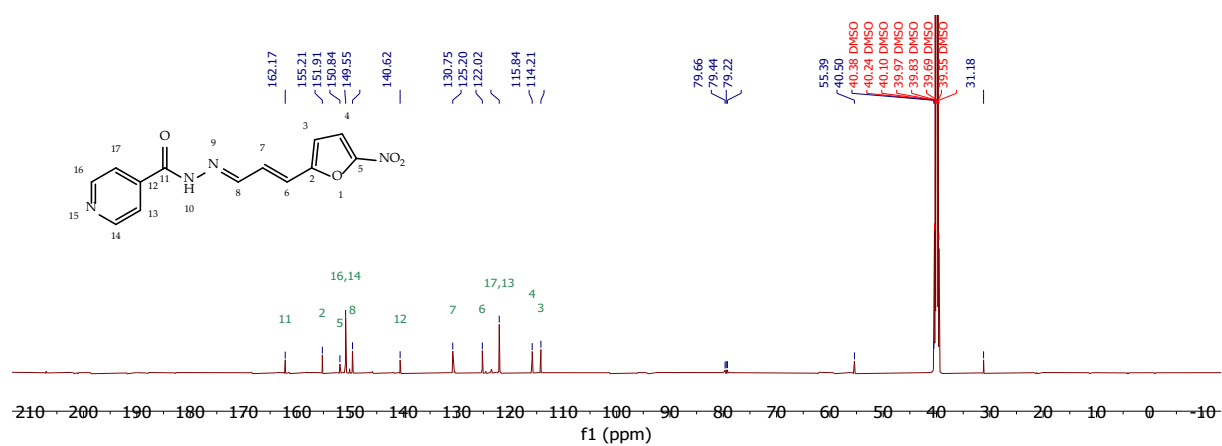

**Figure S10:** <sup>13</sup>C NMR (150 MHz, DMSO-d<sub>6</sub>, 298 K) of compound **3**

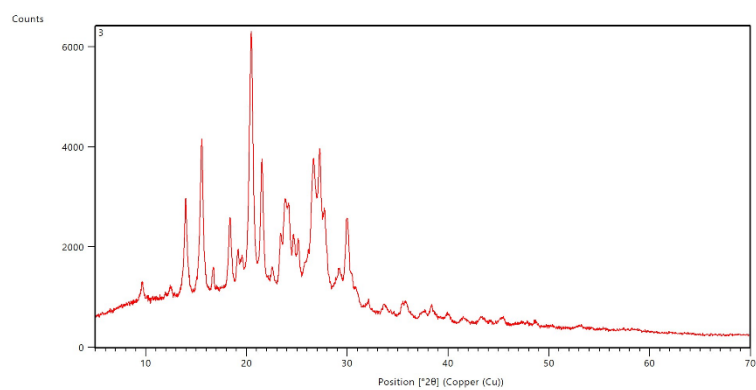

**Figure S11:** Powder XRD of compound **3**

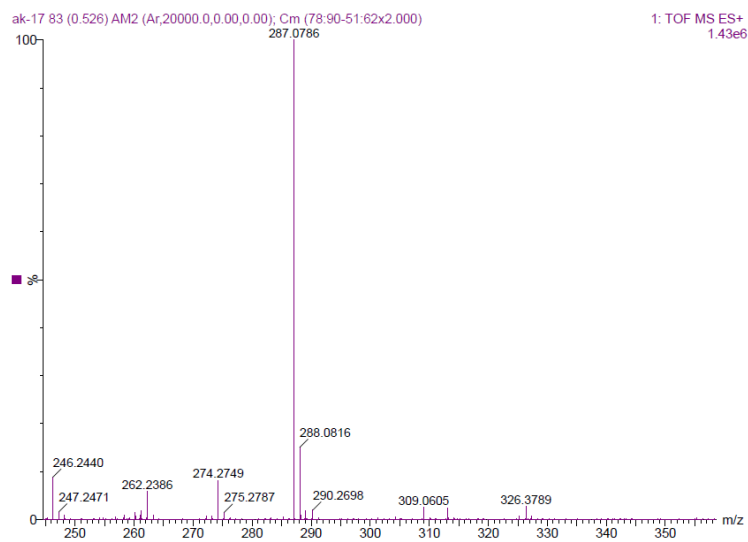

**Figure S12:** HRMS of compound **3**

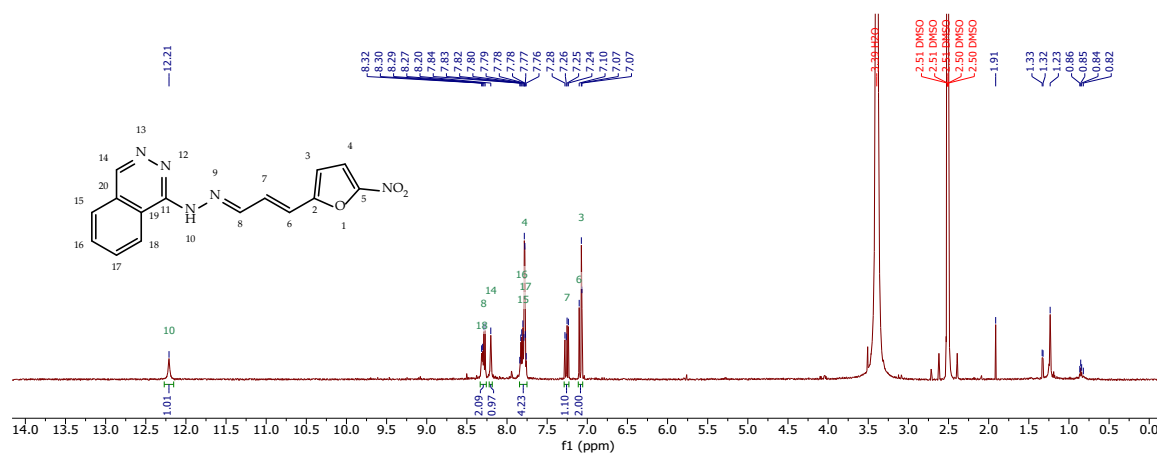

**Figure S13:**  $^1\text{H}$  NMR (600 MHz, DMSO- $d_6$ , 298 K) of compound 4

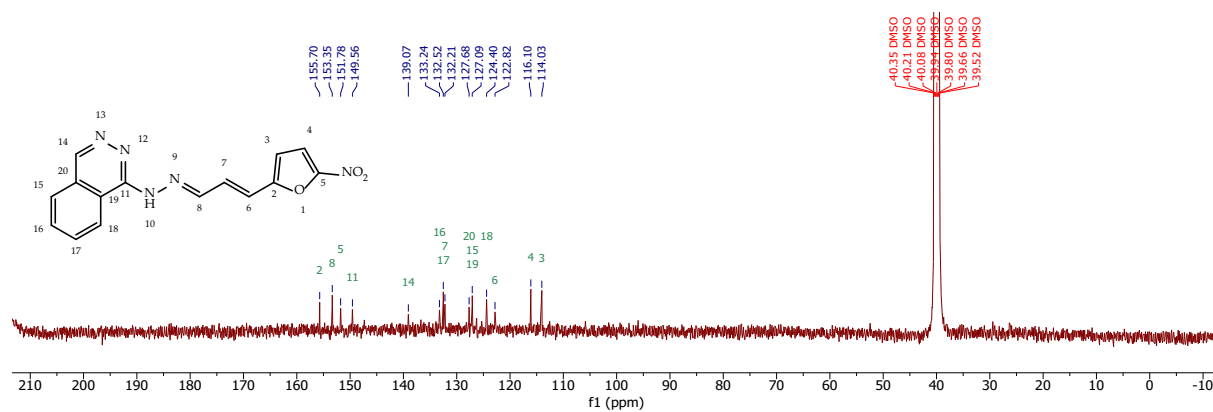

**Figure S14:**  $^{13}\text{C}$  NMR (150 MHz, DMSO- $d_6$ , 298 K) of compound 4

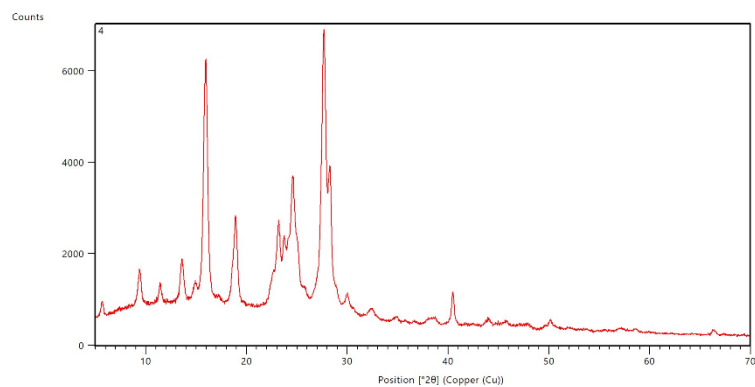

**Figure S15:** Powder XRD of compound 4

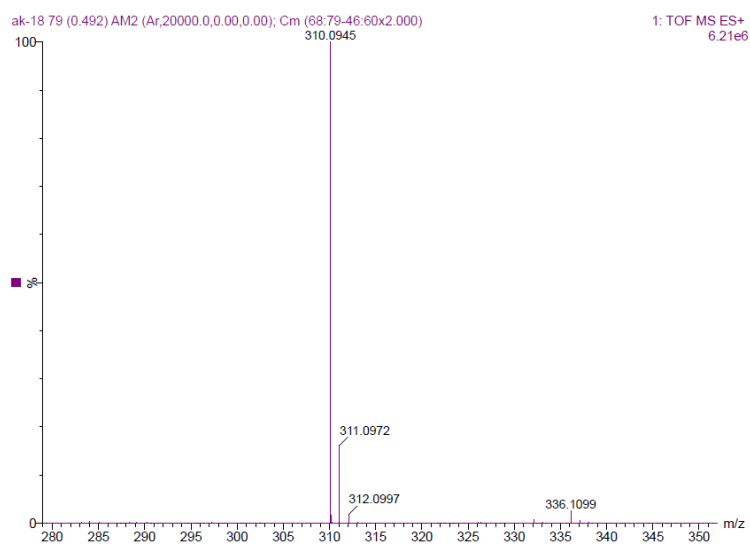

Figure S16: HRMS of compound 4

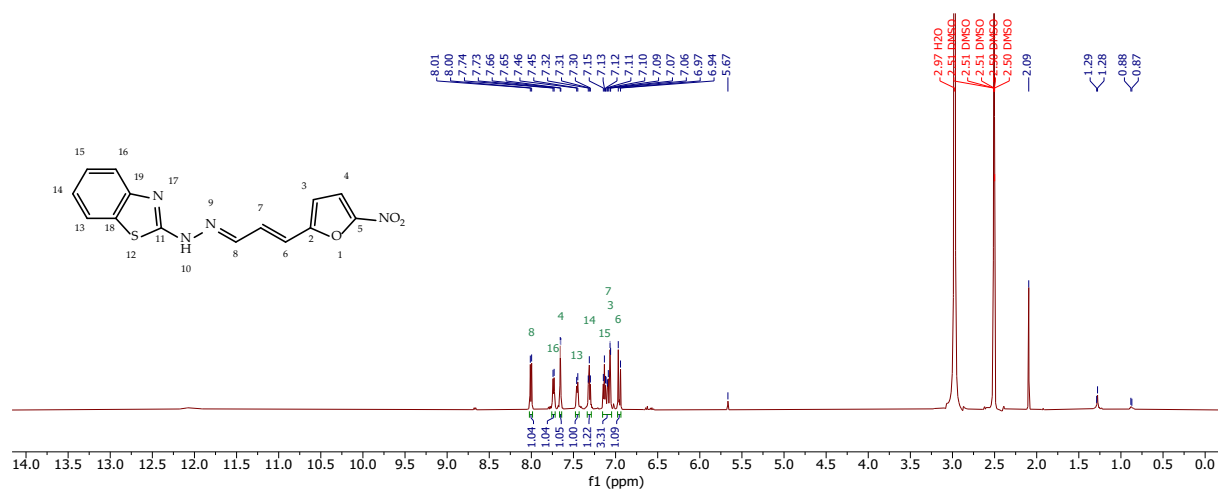

Figure S17:  $^1\text{H}$  NMR (600 MHz, DMSO- $d_6$ , 378 K) of compound 5

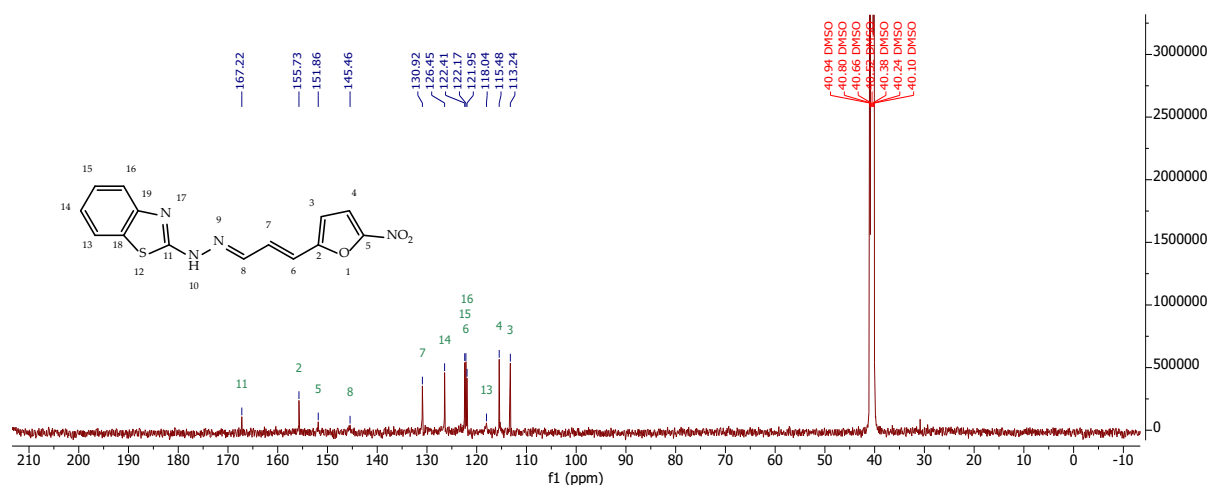

Figure S18:  $^{13}\text{C}$  NMR (150 MHz, DMSO- $d_6$ , 378 K) of compound 5

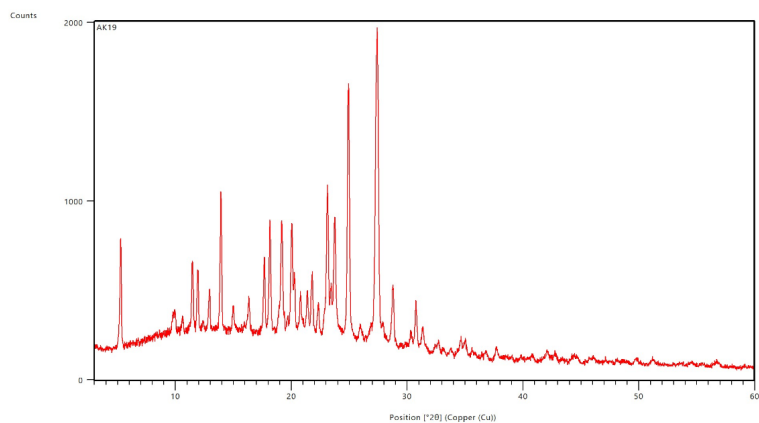

**Figure S19:** Powder XRD of compound 5

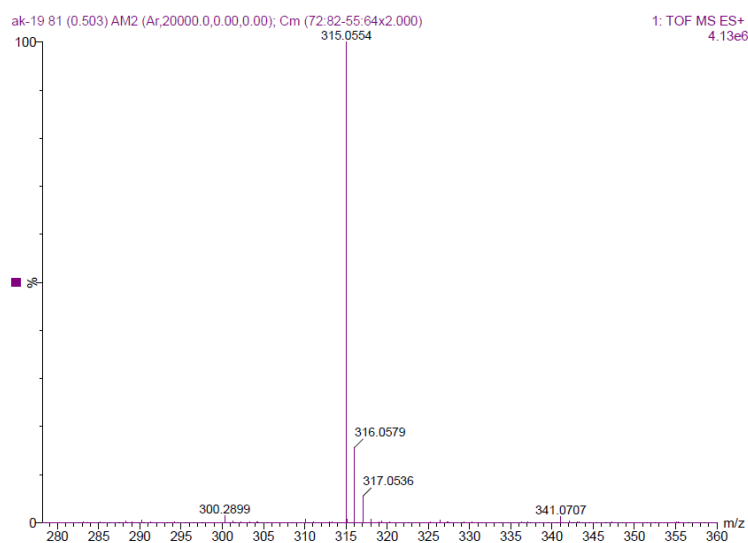

**Figure S20:** HRMS of compound 5

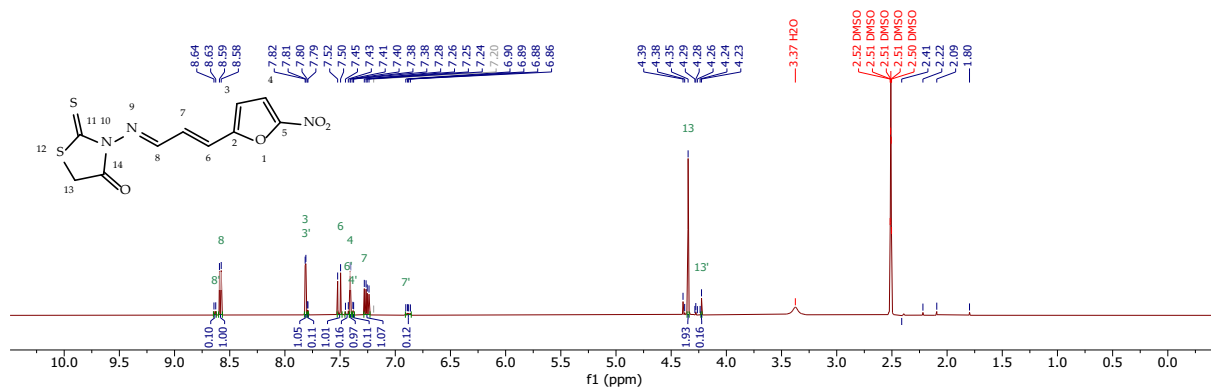

**Figure S21:**  $^1\text{H}$  NMR (600 MHz, DMSO- $d_6$ , 298 K) of compound 6

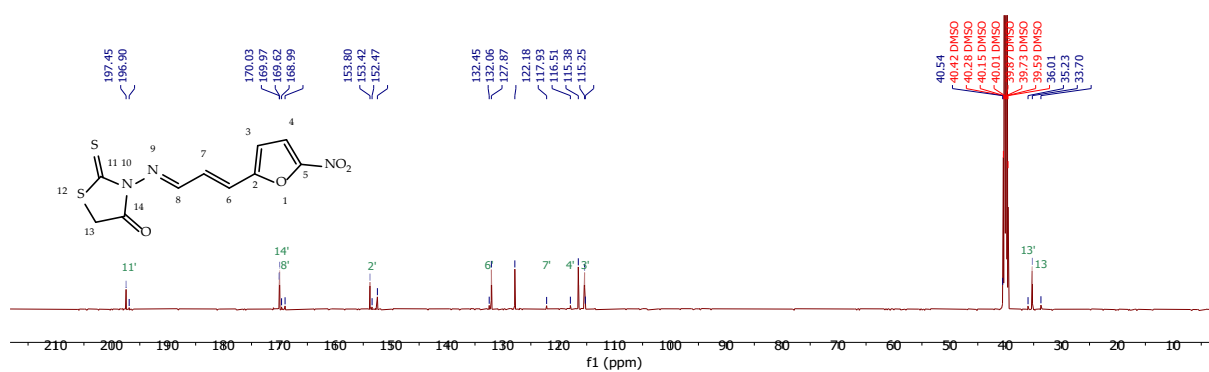

Figure S22: <sup>13</sup>C NMR (150 MHz, DMSO-d<sub>6</sub>, 298 K) of compound 6

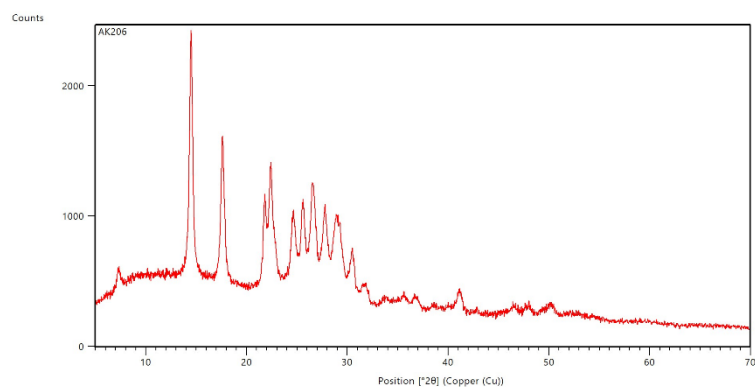

Figure S23: Powder XRD of compound 6

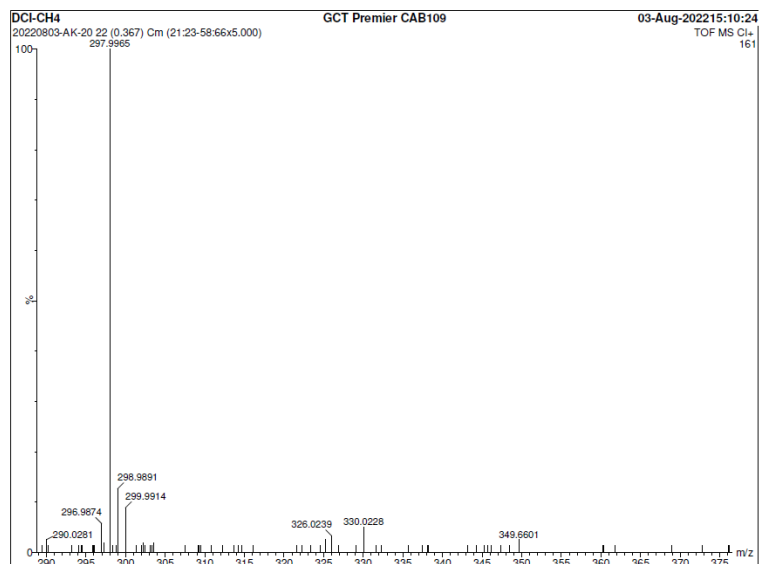

Figure S24: HRMS of compound 6



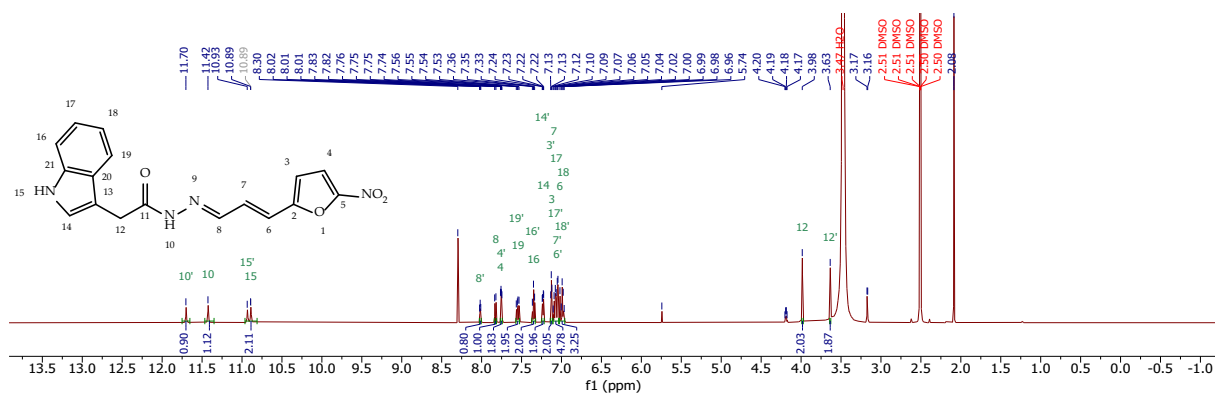

Figure S25:  $^1\text{H}$  NMR (600 MHz, DMSO- $d_6$ , 298 K) of compound 7

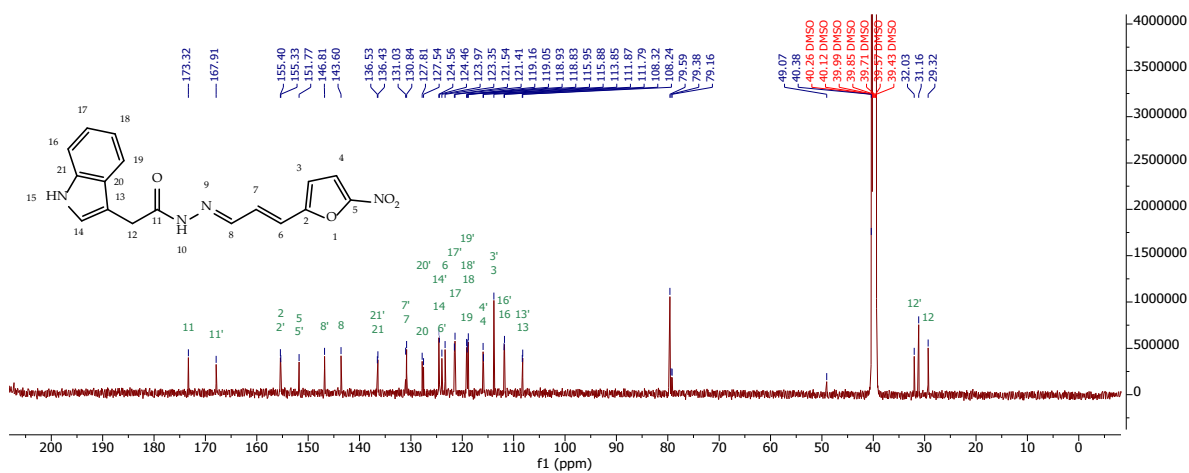

Figure S26:  $^{13}\text{C}$  NMR (150 MHz, DMSO- $d_6$ , 298 K) of compound 7

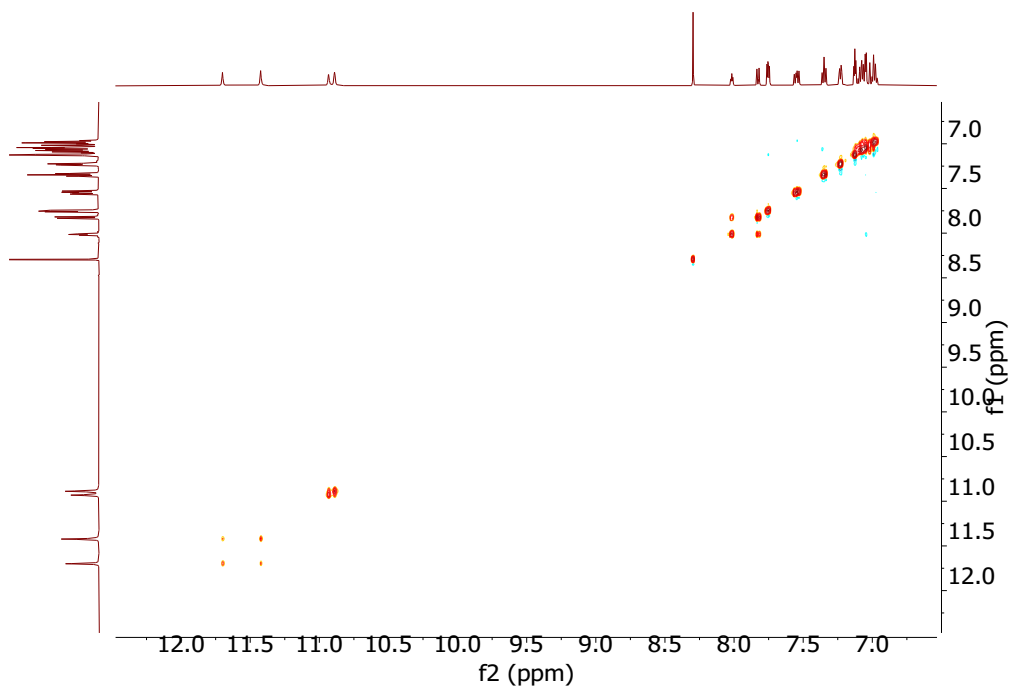

Figure S27: ROESY NMR (DMSO- $d_6$ , 298 K) of compound 7

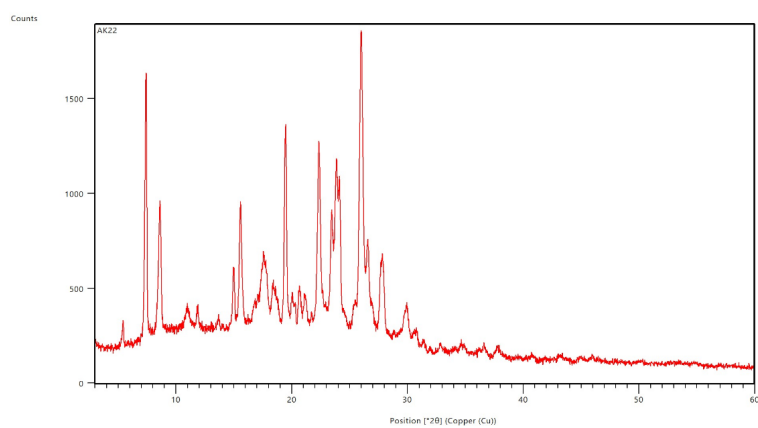

**Figure S28:** Powder XRD of compound **7**

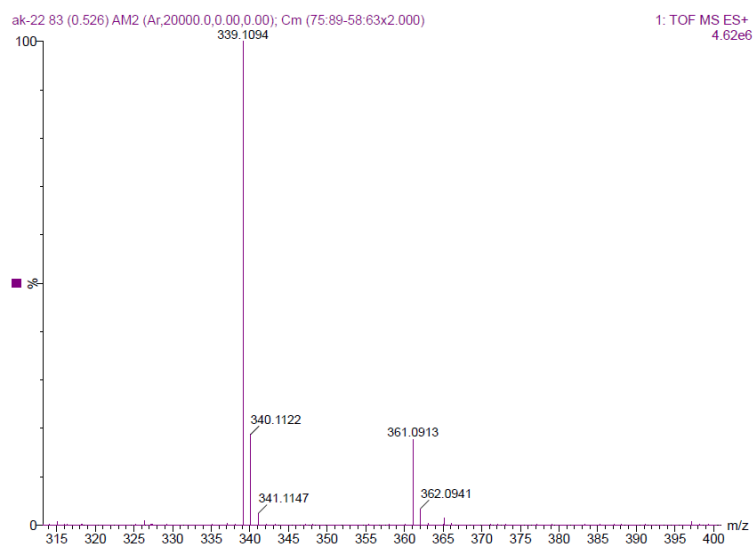

**Figure S29:** HRMS of compound **7**

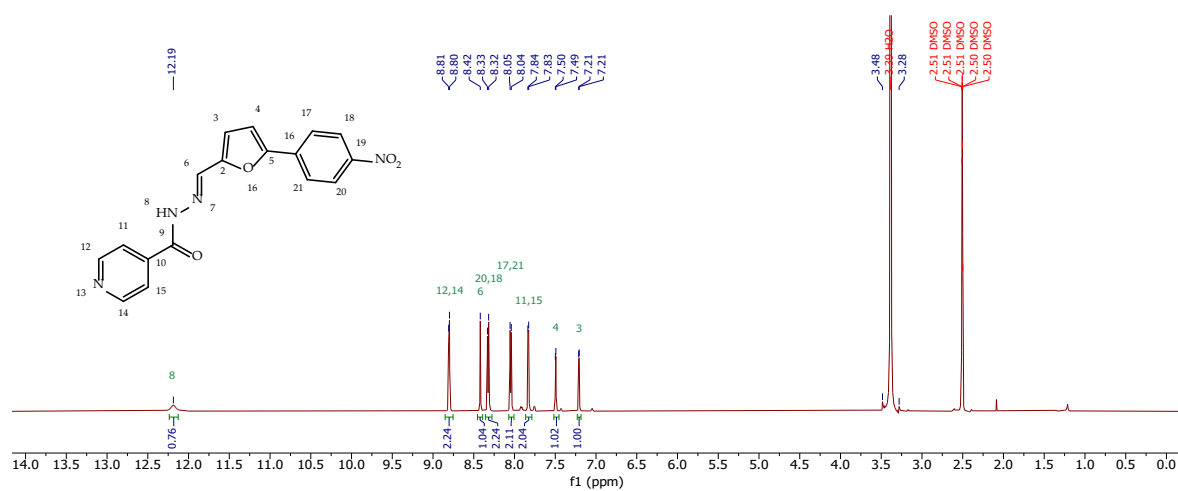

**Figure S30:** <sup>1</sup>H NMR (600 MHz, DMSO-d<sub>6</sub>, 298 K) of compound 8

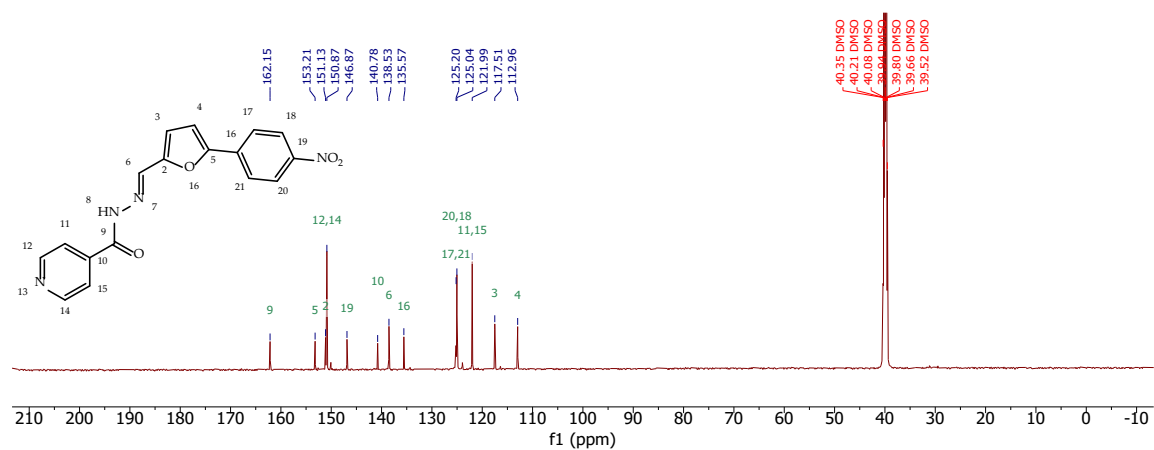

**Figure S31:** <sup>13</sup>C NMR (150 MHz, DMSO-d<sub>6</sub>, 298 K) of compound 8

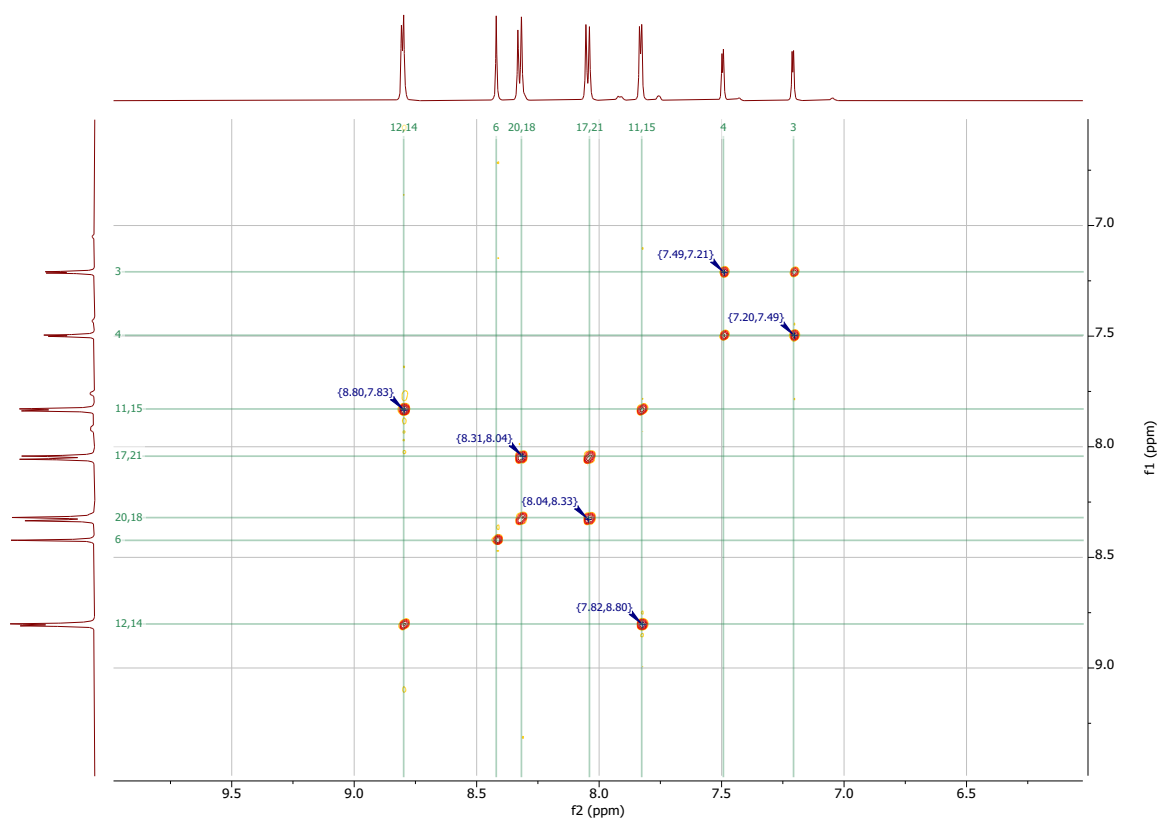

Figure S32: COSY NMR (DMSO-d<sub>6</sub>, 298 K) of compound 8

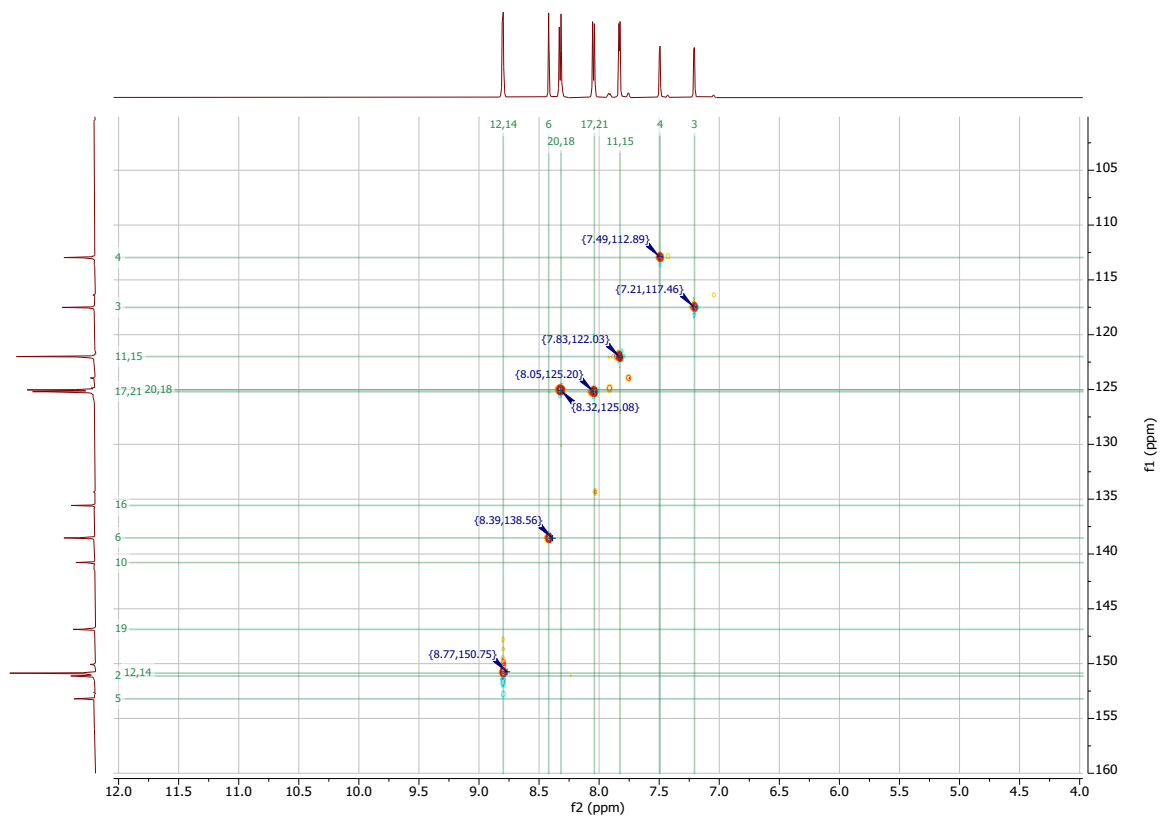

Figure S33: HSQS NMR (DMSO-d<sub>6</sub>, 298 K) of compound 8

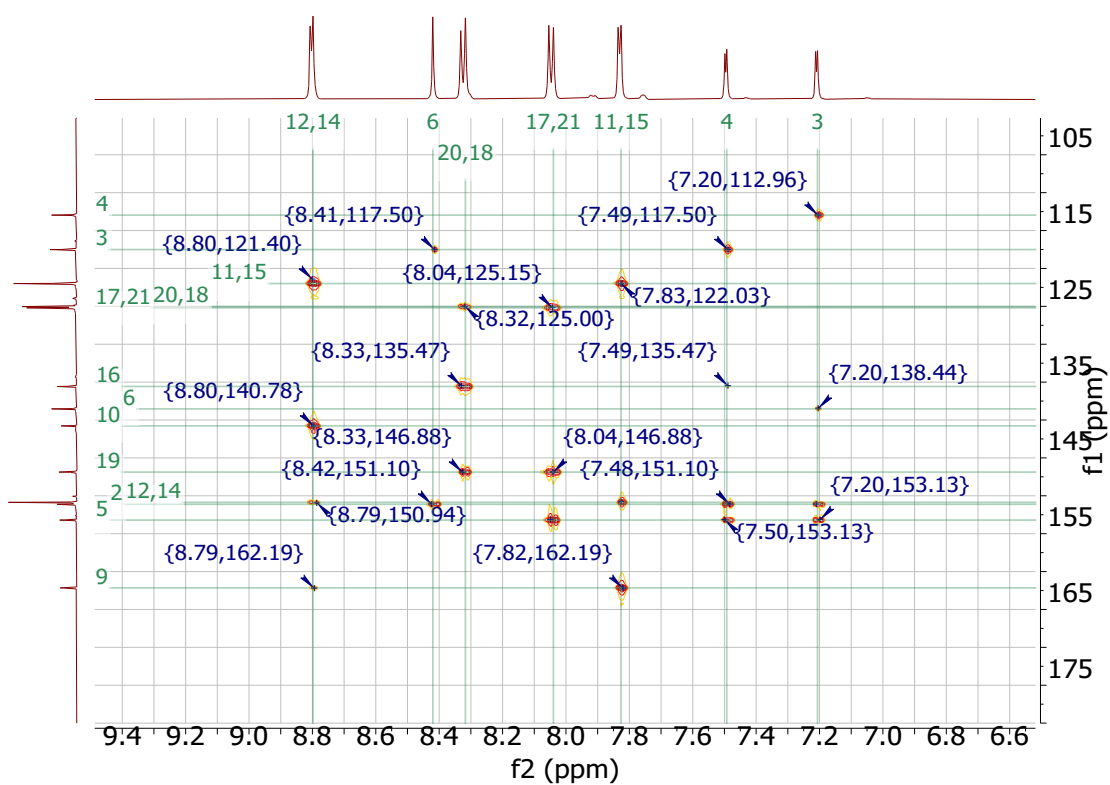

Figure S34: HMBC NMR (DMSO-d<sub>6</sub>, 298 K) of compound 8

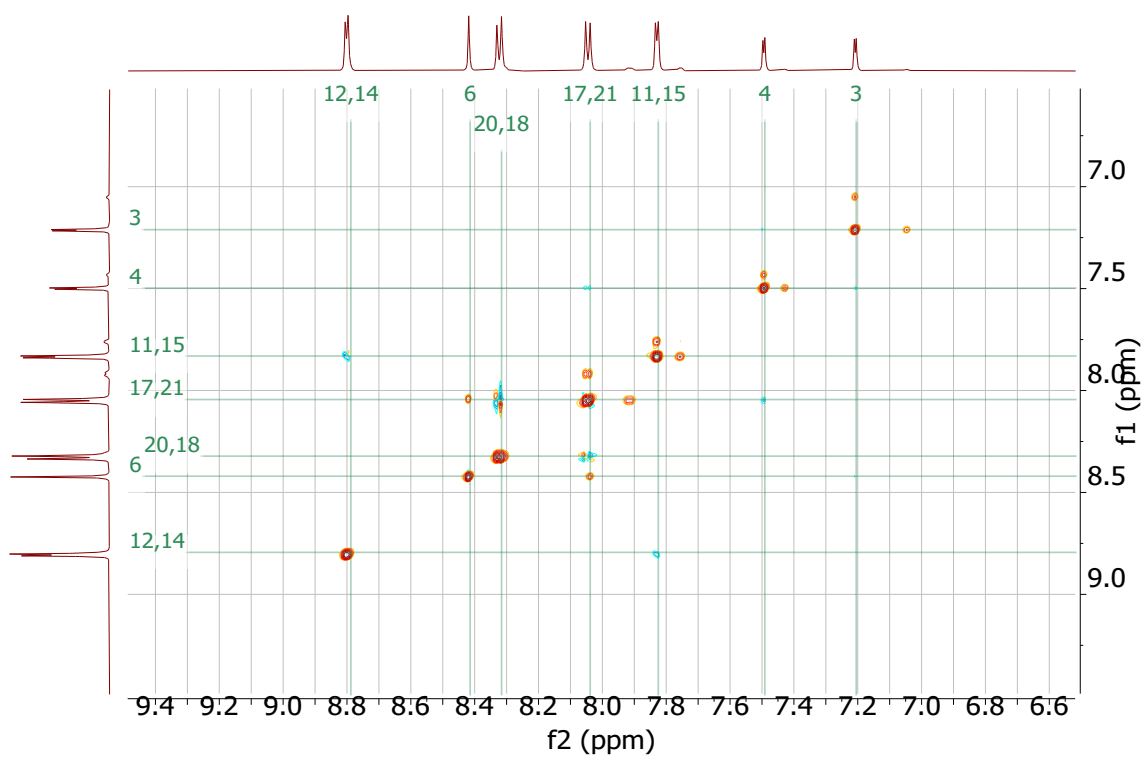

Figure S35: ROESY NMR (DMSO-d<sub>6</sub>, 298 K) of compound 8

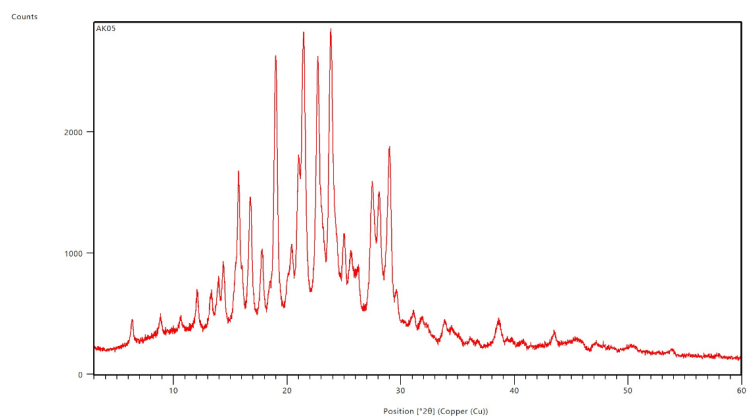

**Figure S36:** Powder XRD of compound **8**

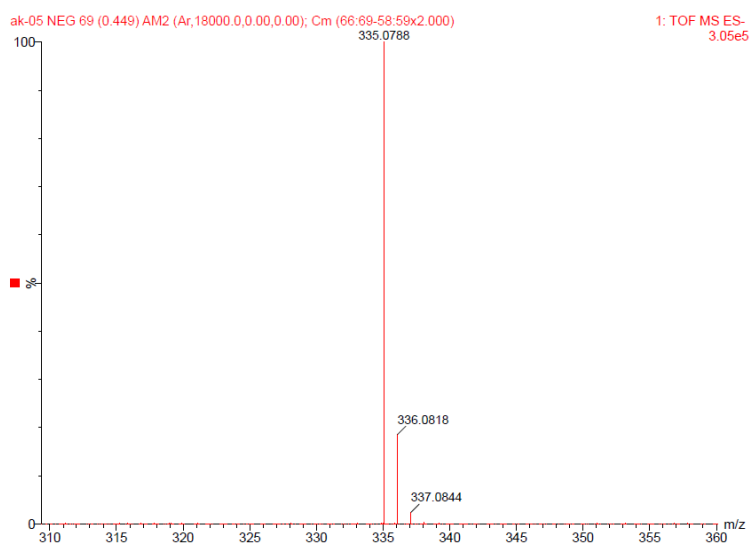

**Figure S37:** HRMS of compound **8**

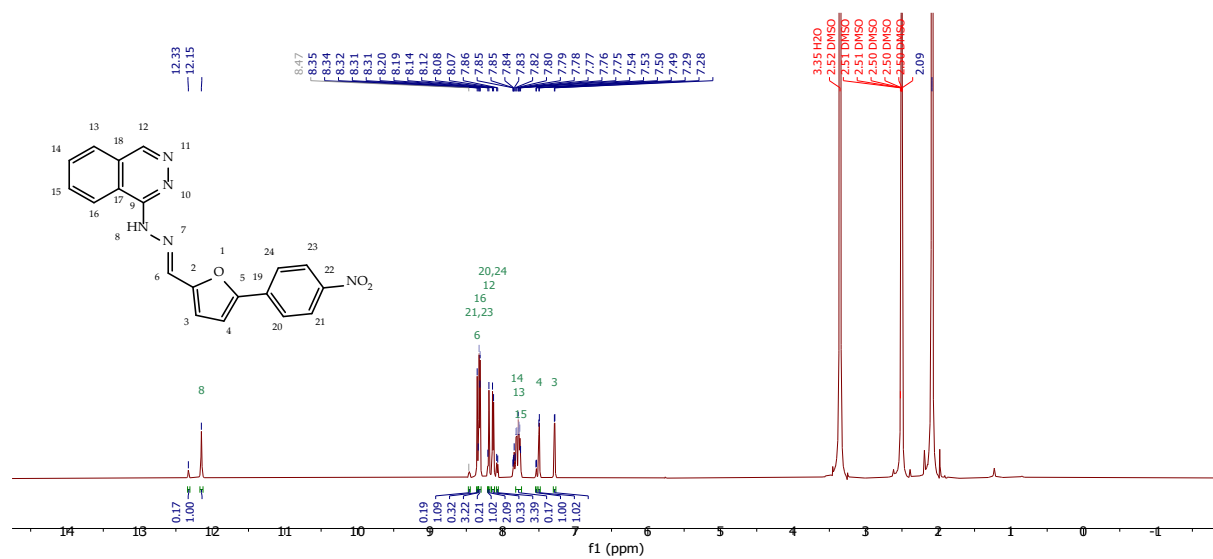

**Figure S38:**  $^1\text{H}$  NMR (600 MHz, DMSO- $d_6$ , 298 K) of compound **9**

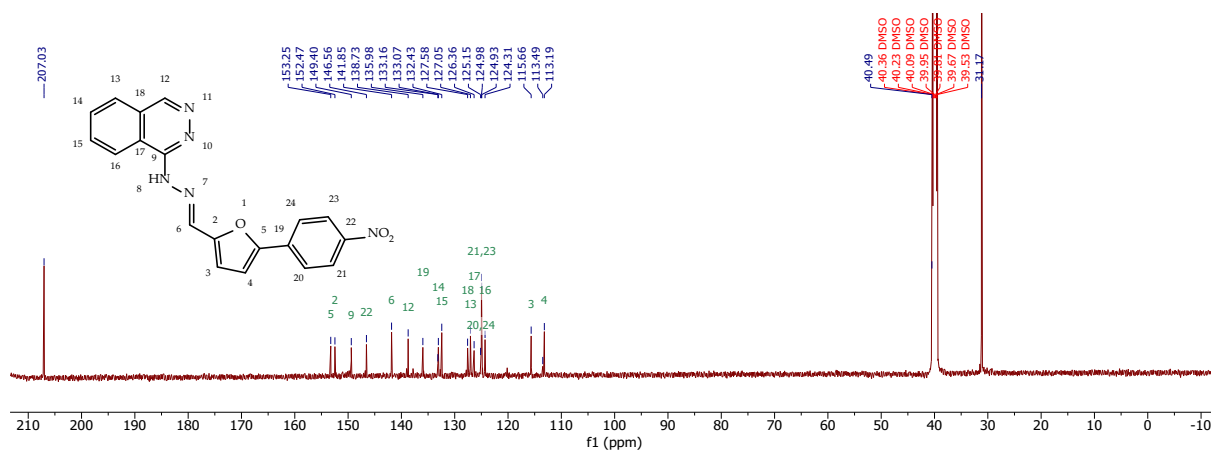

Figure S39:  $^{13}\text{C}$  NMR (150 MHz, DMSO- $d_6$ , 298 K) of compound 9

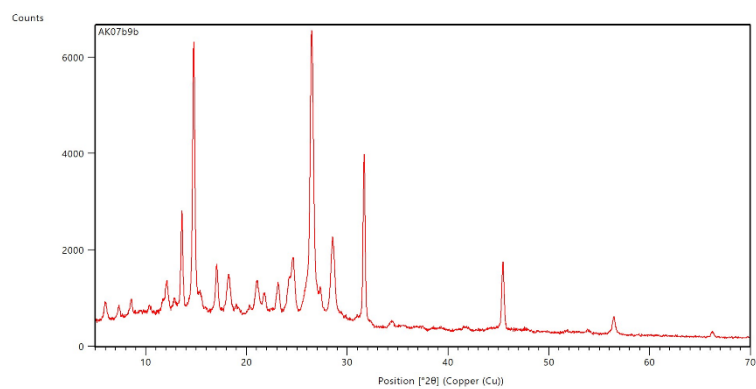

Figure S40: Powder XRD of compound 9

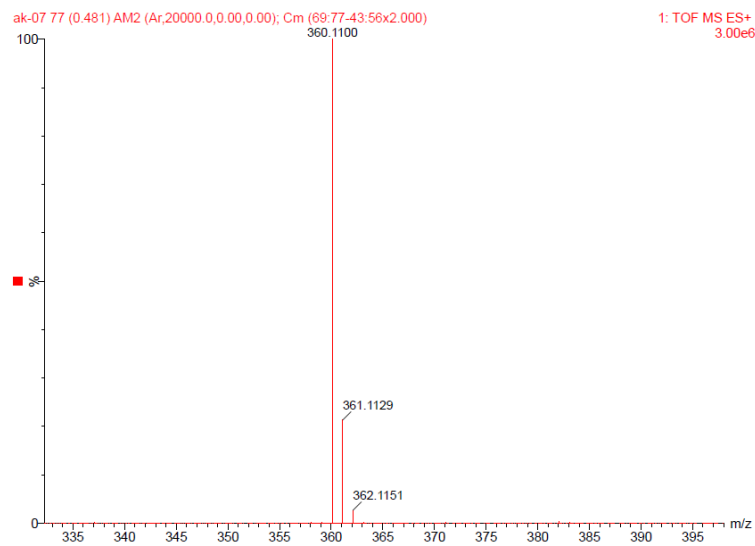

Figure S41: HRMS of compound 9

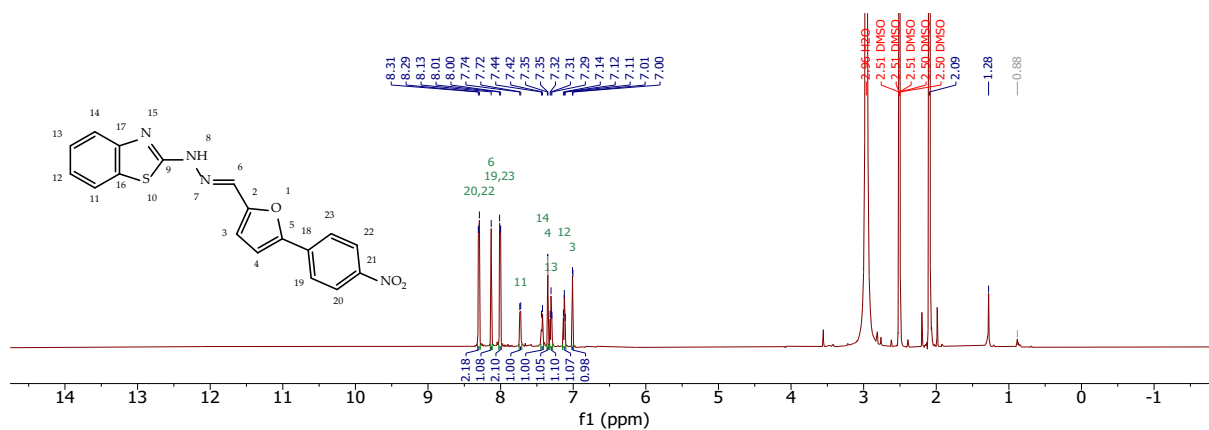

**Figure S42:** <sup>1</sup>H NMR (600 MHz, DMSO-d<sub>6</sub>, 383 K) of compound **10**

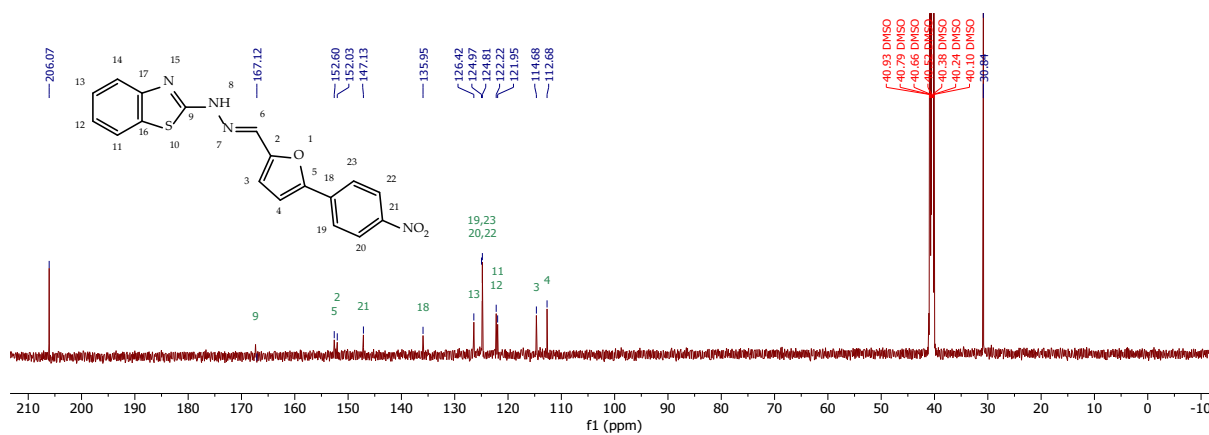

**Figure S43:** <sup>13</sup>C NMR (150 MHz, DMSO-d<sub>6</sub>, 383 K) of compound **10**

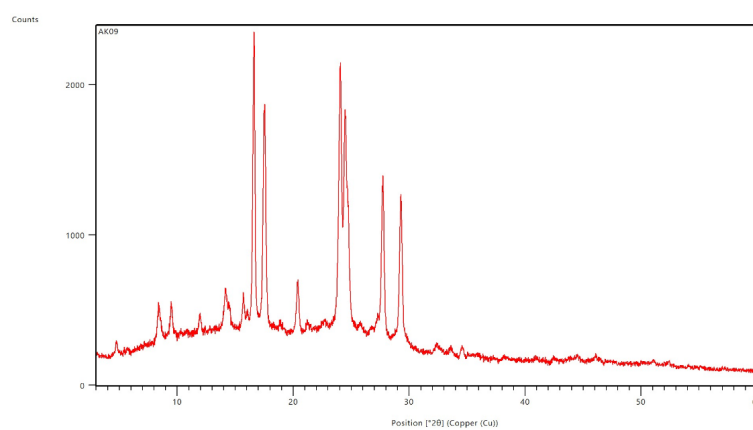

**Figure S44:** Powder XRD of compound **10**



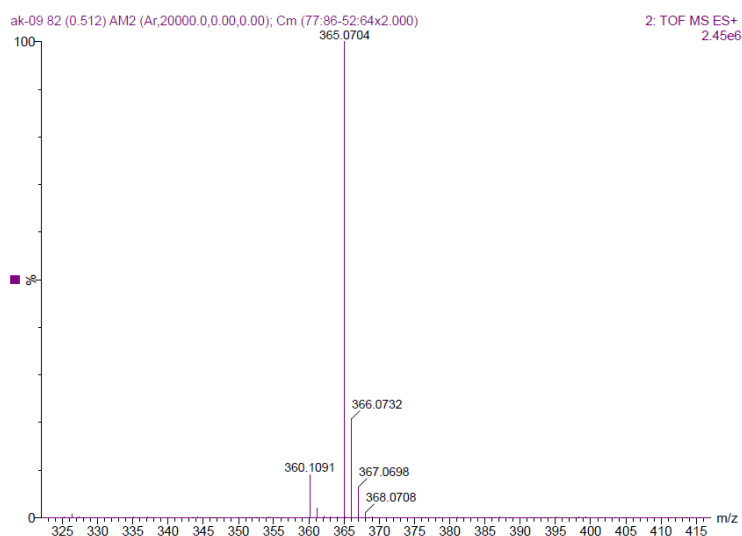

Figure S45: HRMS of compound 10

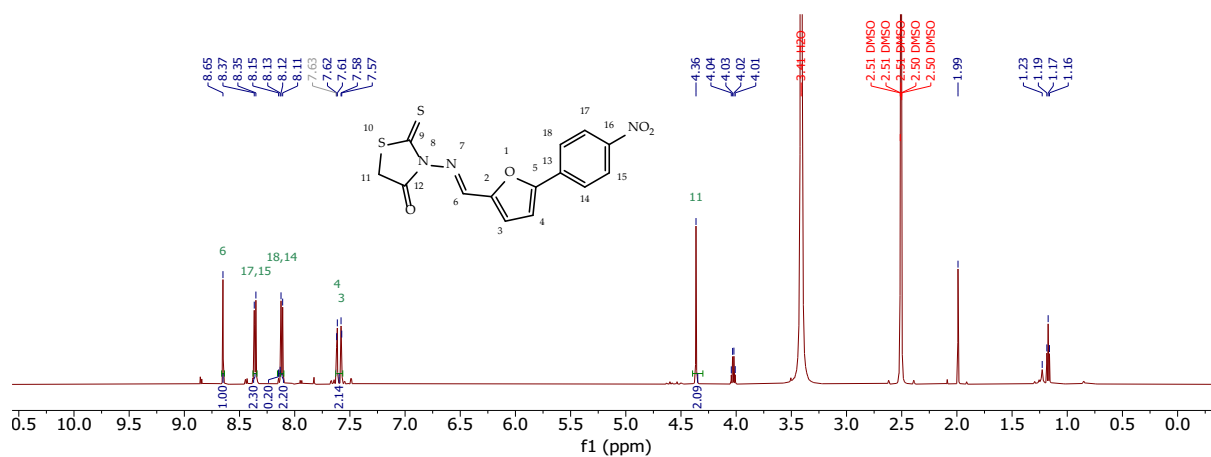

Figure S46:  $^1\text{H}$  NMR (600 MHz, DMSO- $d_6$ , 298 K) of compound 11

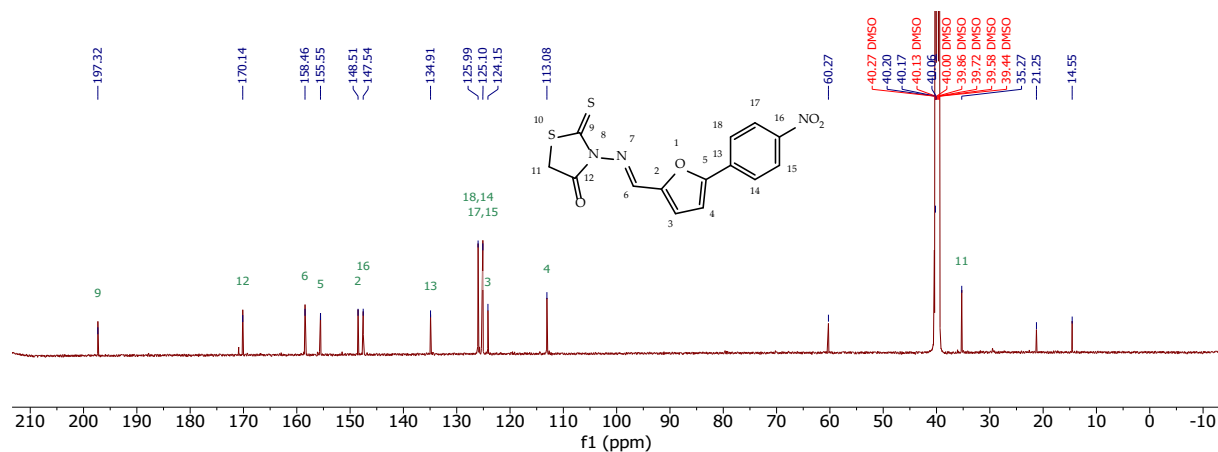

Figure S47:  $^{13}\text{C}$  NMR (150 MHz, DMSO- $d_6$ , 298 K) of compound 11

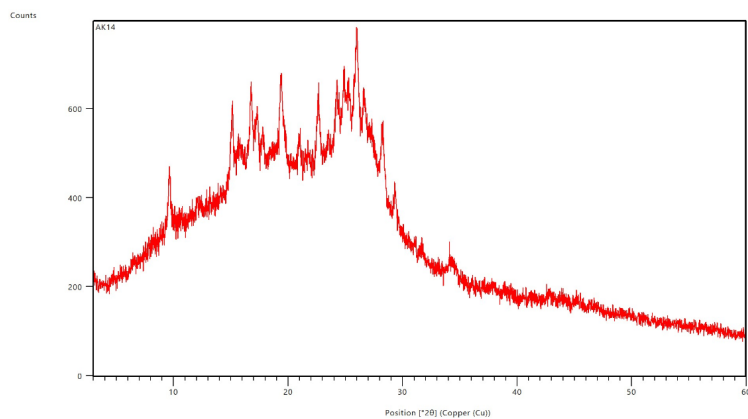

Figure S48: Powder XRD of compound 11

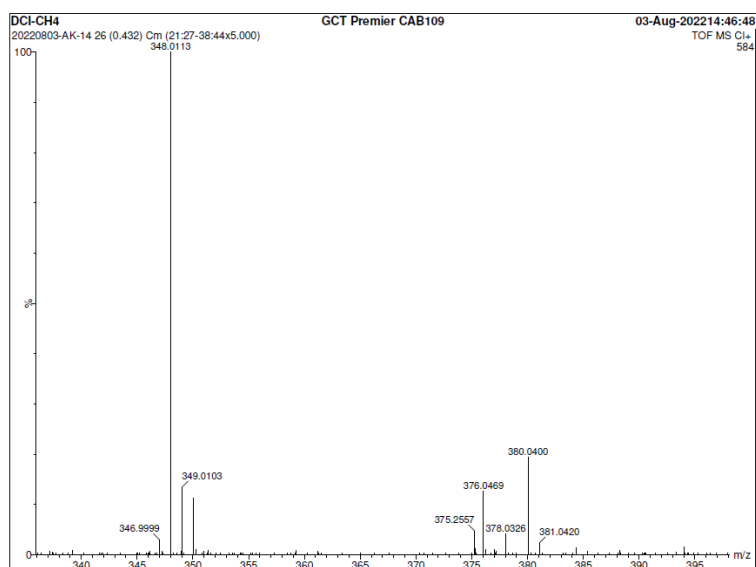

Figure S49: HRMS of compound 11

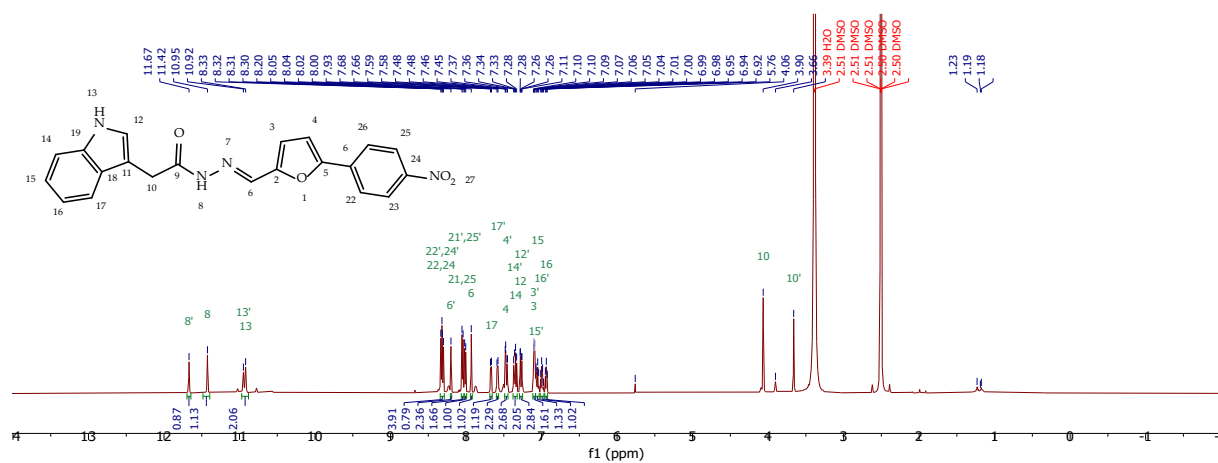

Figure S50: <sup>1</sup>H NMR (600 MHz, DMSO-d<sub>6</sub>, 298 K) of compound 12

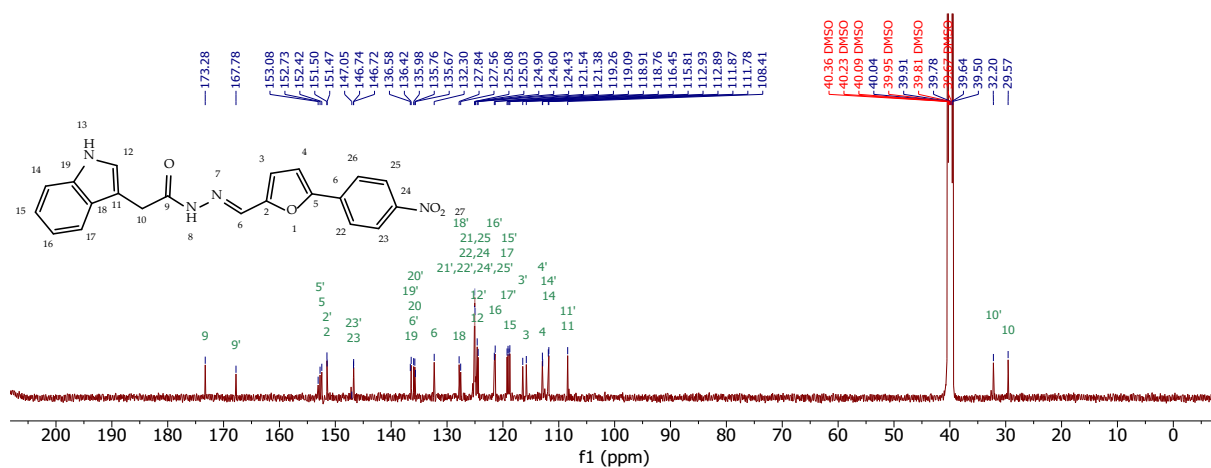

Figure S51:  $^{13}\text{C}$  NMR (150 MHz, DMSO- $d_6$ , 298 K) of compound 12

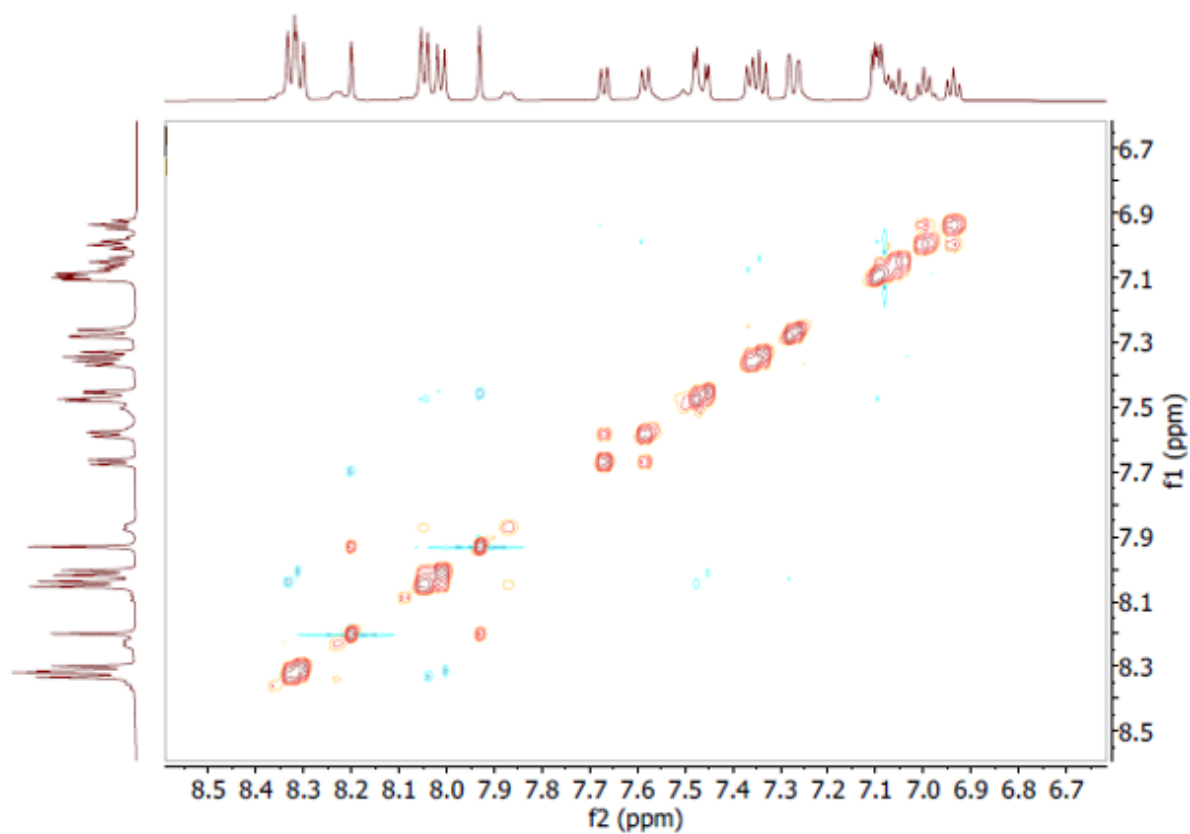

Figure S52: ROESY NMR (DMSO- $d_6$ , 298 K) of compound 12

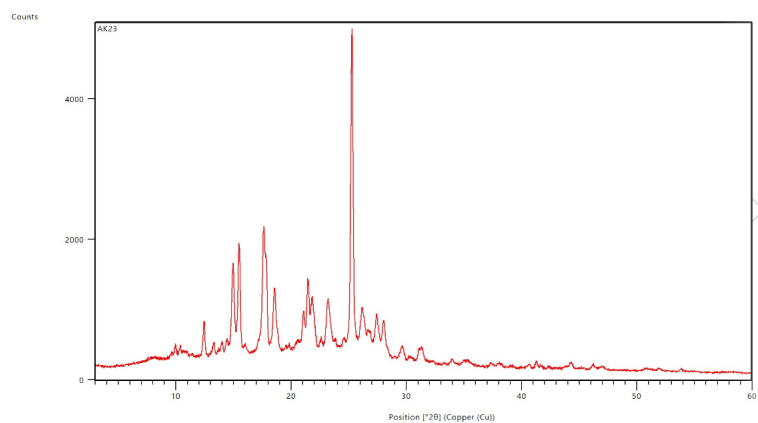

**Figure S53:** Powder XRD of compound **12**

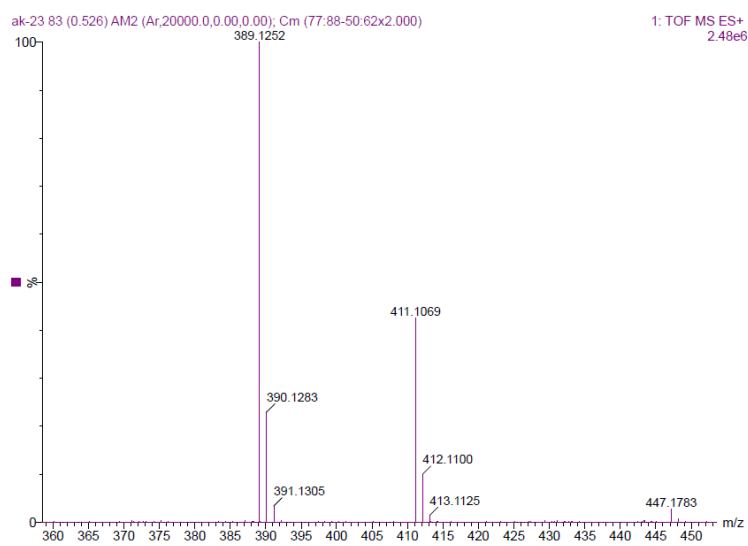

**Figure S54:** HRMS of compound **12**

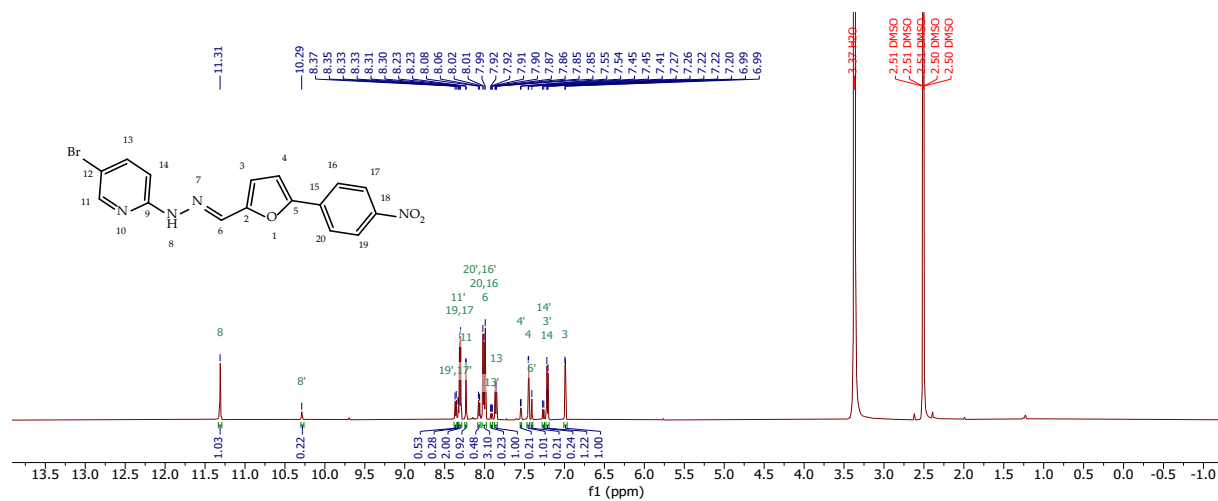

**Figure S55:**  $^1\text{H}$  NMR (600 MHz, DMSO- $d_6$ , 298 K) of compound **13**

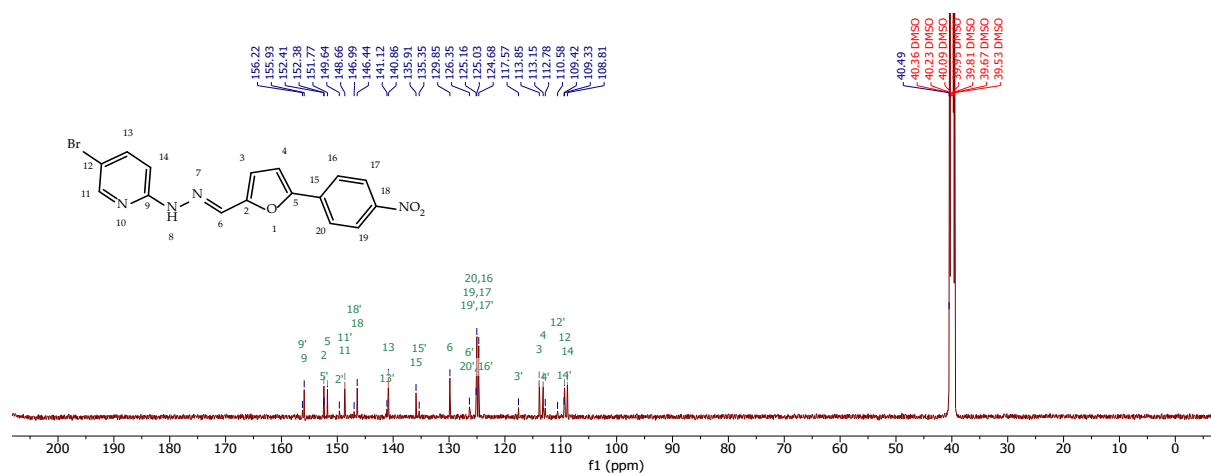

Figure S56: <sup>13</sup>C NMR (150 MHz, DMSO-d<sub>6</sub>, 298 K) of compound 13

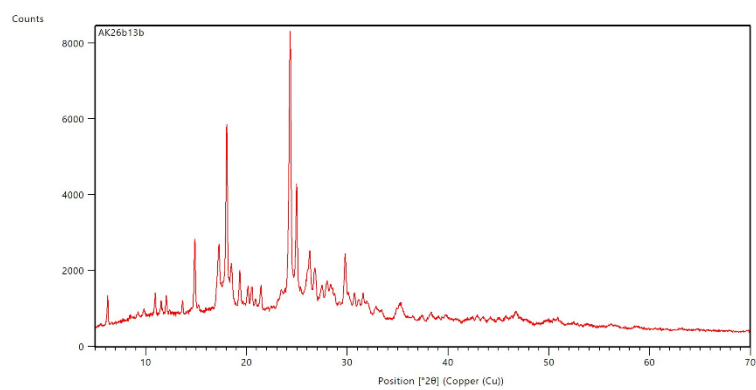

Figure S57: Powder XRD of compound 13

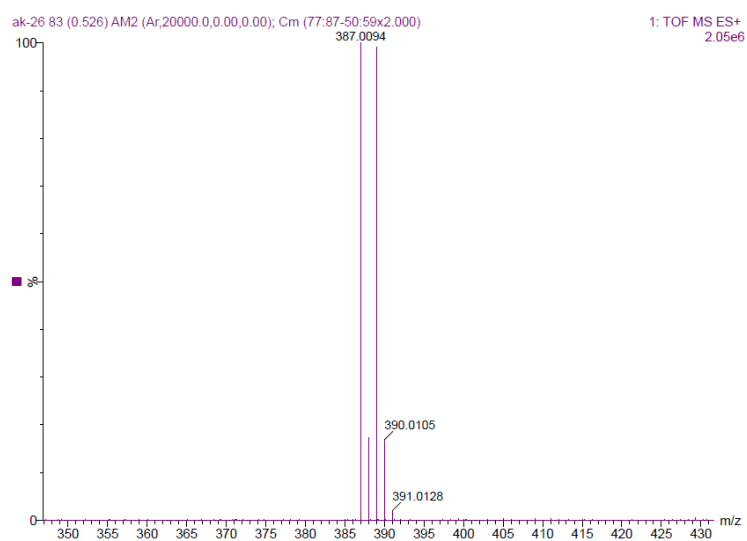

Figure S58: HRMS of compound 13

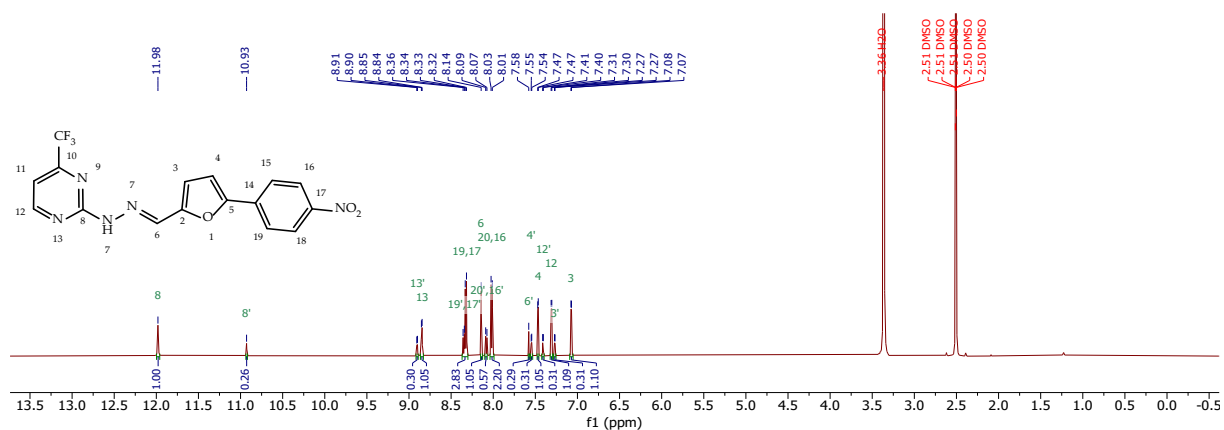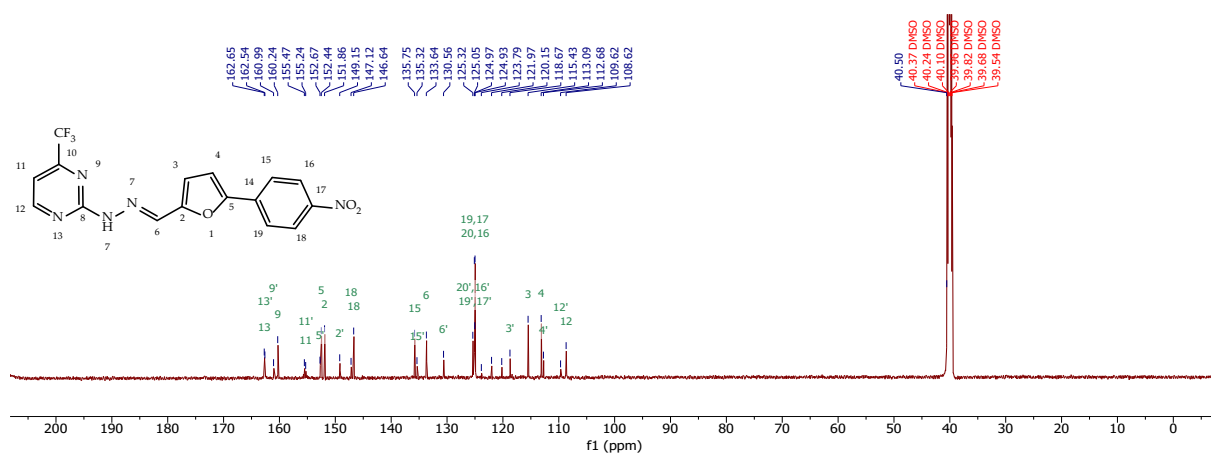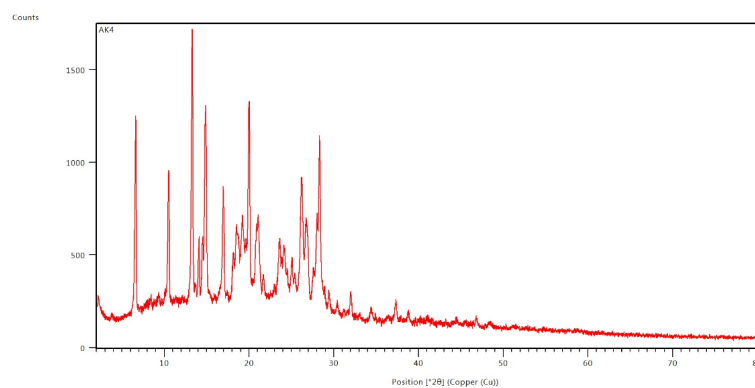

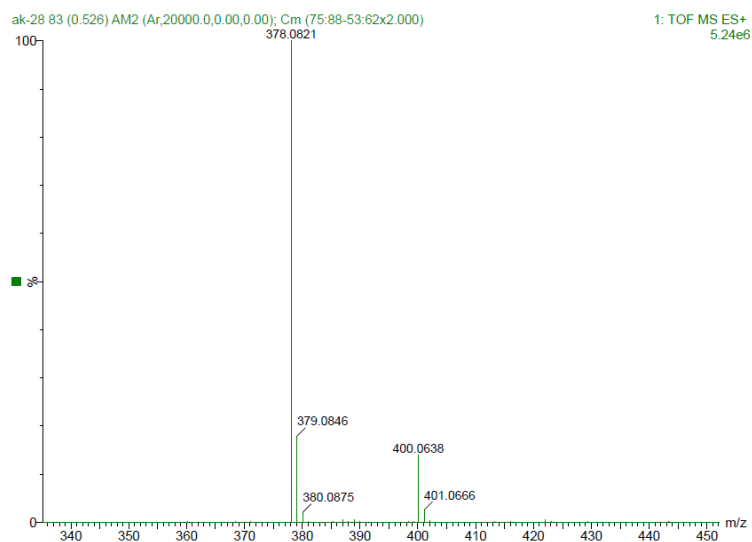

Figure S62: HRMS of compound 14

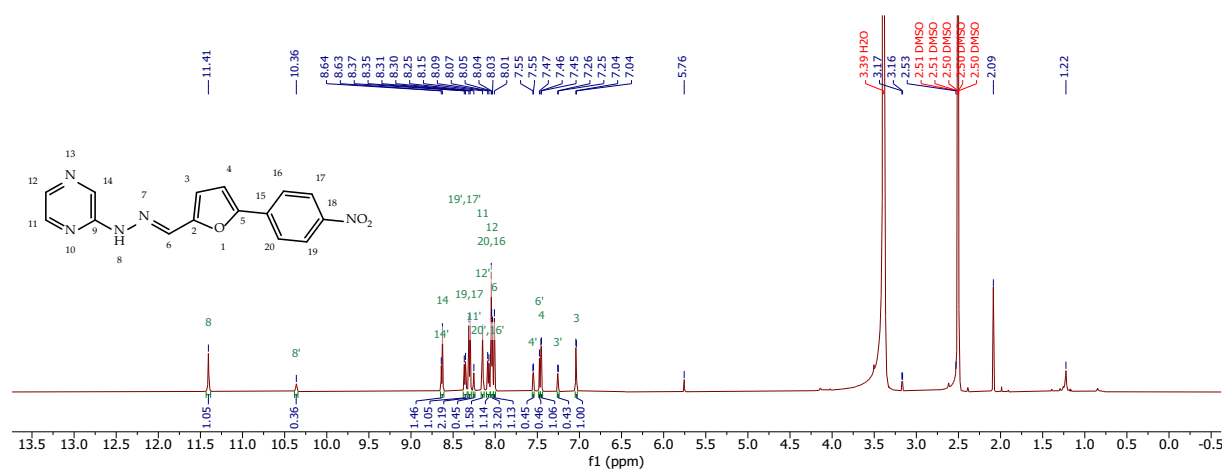

Figure S63:  $^1\text{H}$  NMR (600 MHz, DMSO- $d_6$ , 298 K) of compound 15

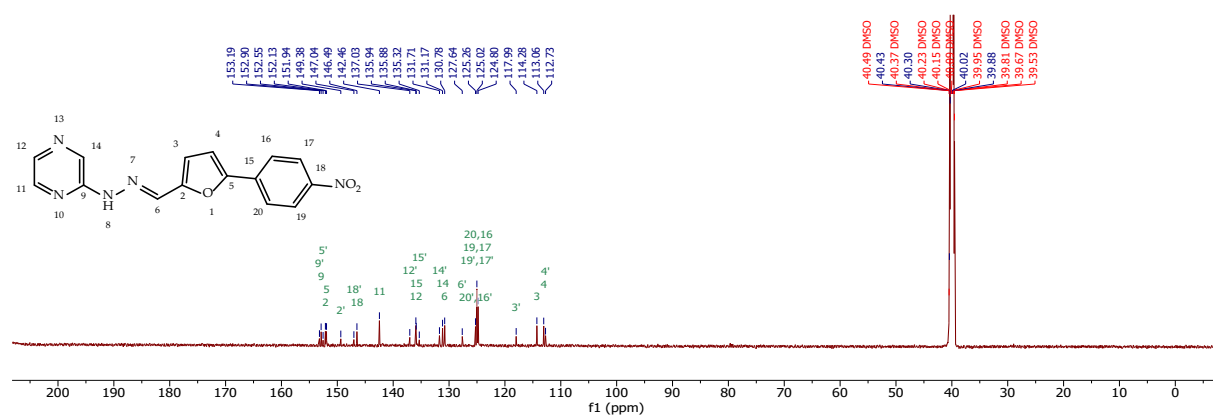

Figure S64:  $^{13}\text{C}$  NMR (150 MHz, DMSO- $d_6$ , 298 K) of compound 15

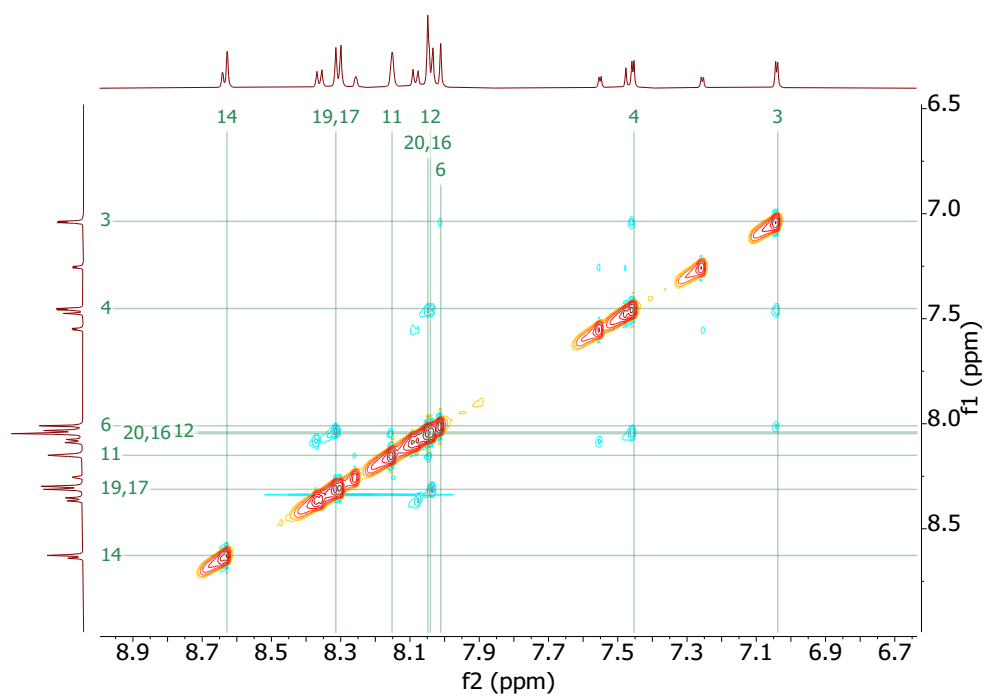

**Figure S65a:** ROESY NMR (DMSO-d<sub>6</sub>, 298 K) of compound 15

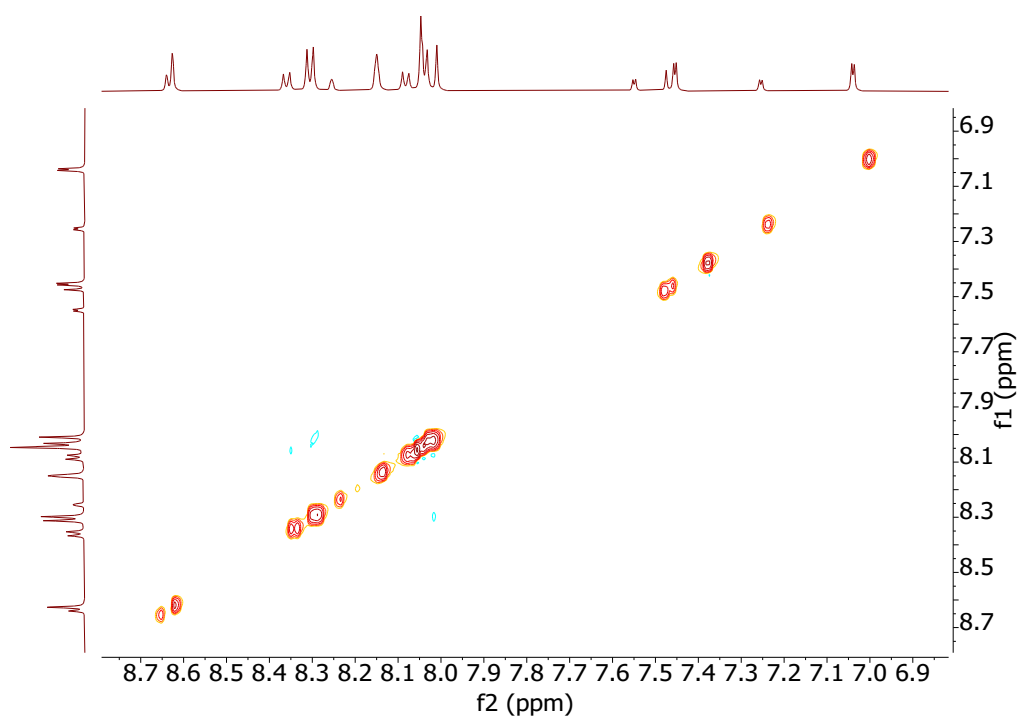

**Figure S65b:** ROESY NMR (DMSO-d<sub>6</sub>, 348 K) of compound 15



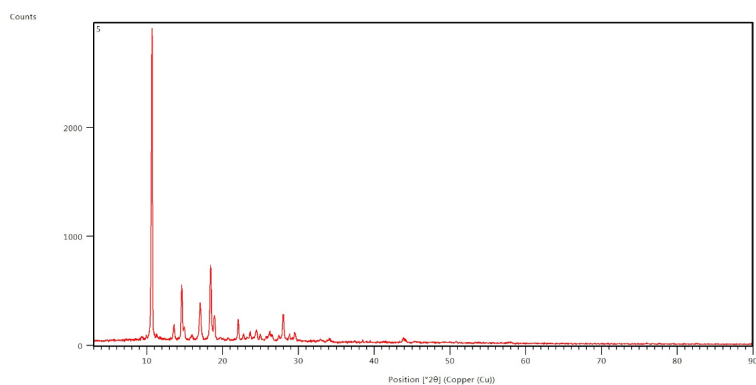

**Figure S66:** Powder XRD of compound **15**

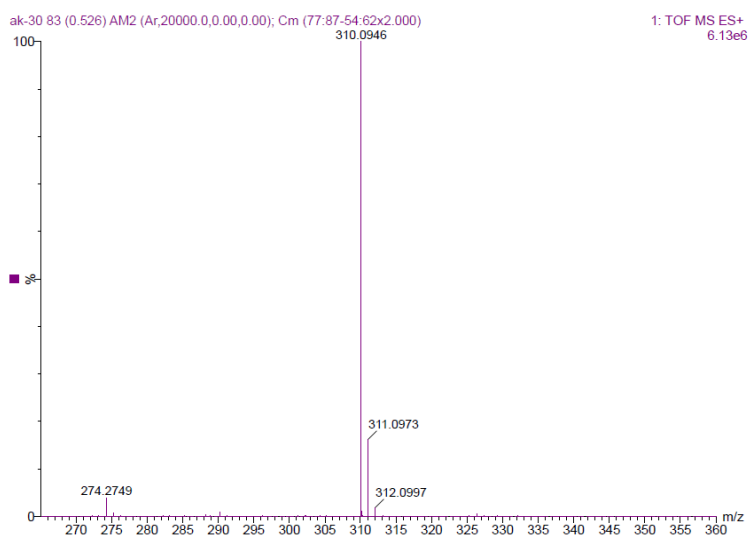

**Figure S67:** HRMS of compound **15**

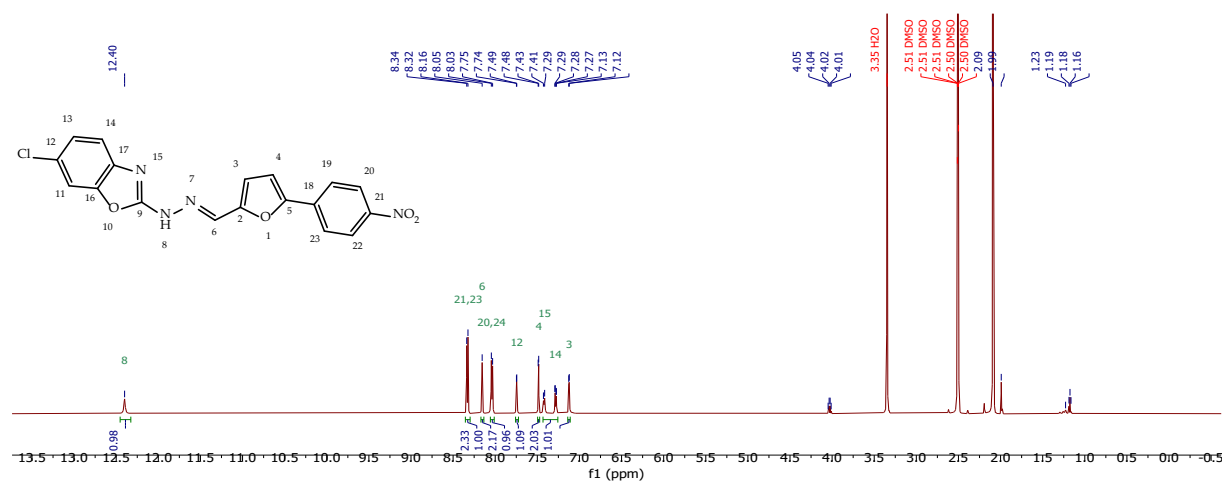

**Figure S68:**  $^1\text{H}$  NMR (600 MHz, DMSO- $d_6$ , 298 K) of compound **16**

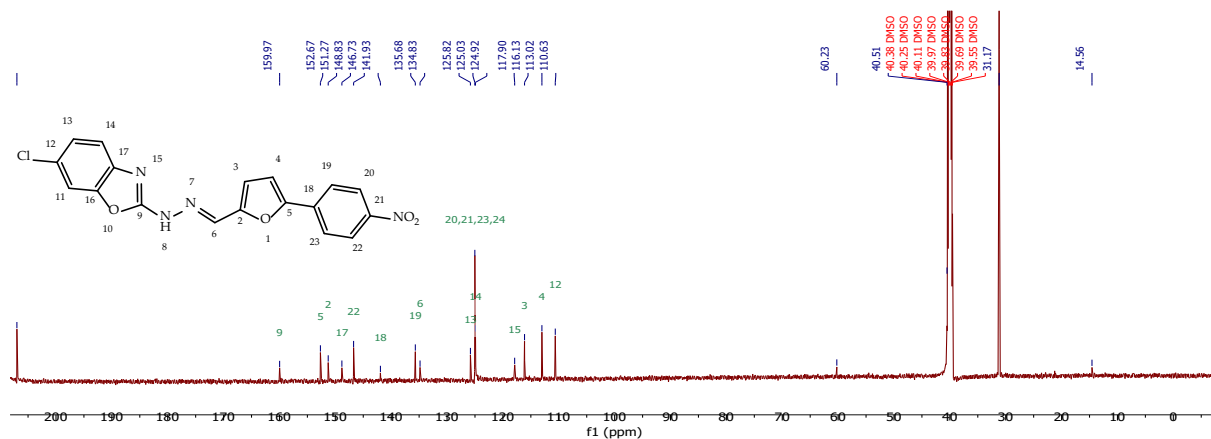

Figure S69:  $^{13}\text{C}$  NMR (150 MHz, DMSO-d<sub>6</sub>, 298 K) of compound 16

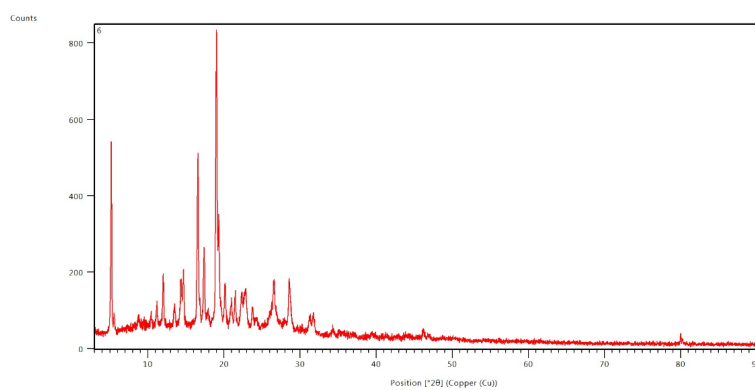

Figure S70: Powder XRD of compound 16

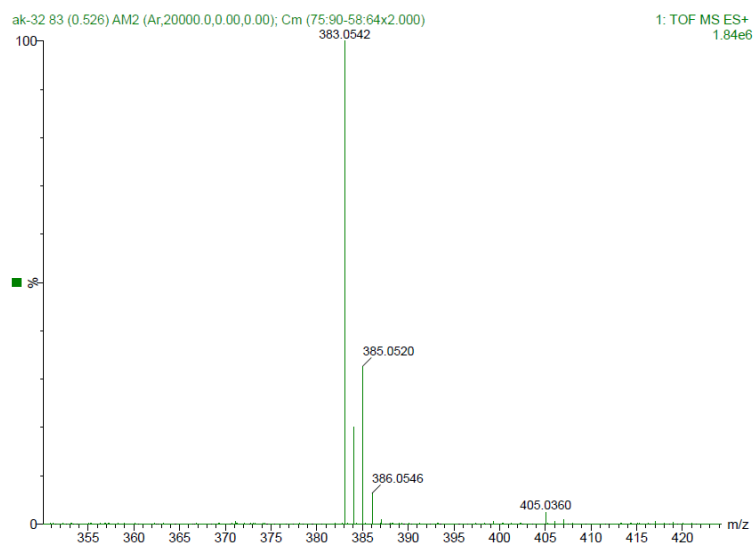

Figure S71: HRMS of compound 16

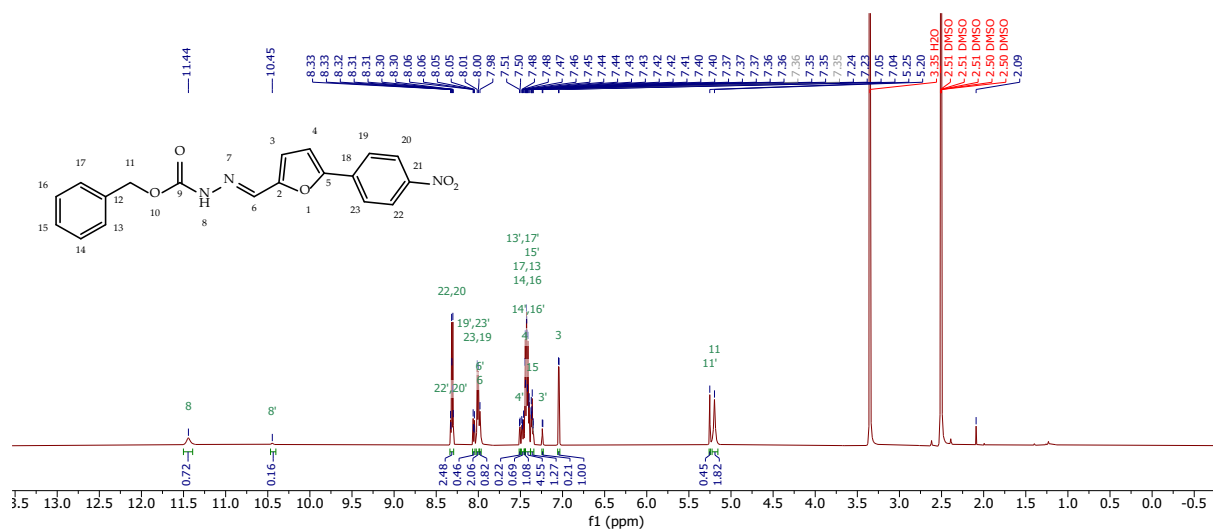

**Figure S72:**  $^1\text{H}$  NMR (600 MHz, DMSO- $d_6$ , 298 K) of compound **17**

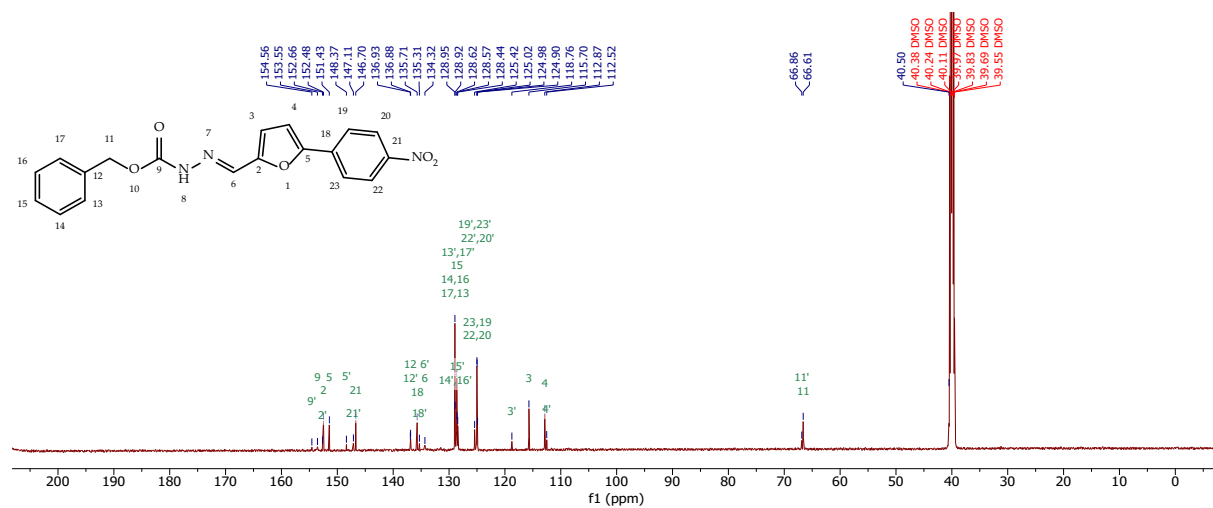

**Figure S73:**  $^{13}\text{C}$  NMR (150 MHz, DMSO- $d_6$ , 298 K) of compound **17**

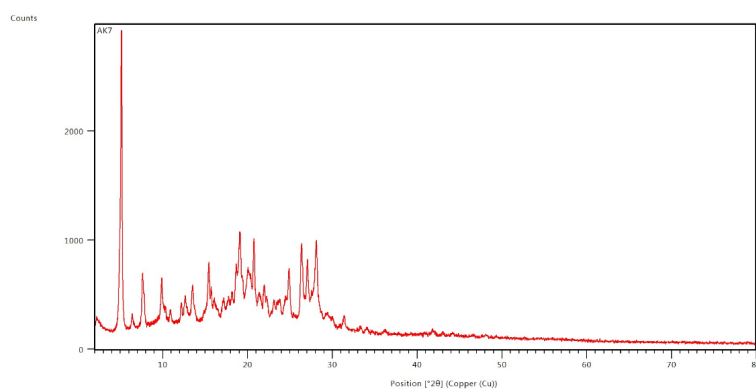

**Figure S74:** Powder XRD of compound **17**

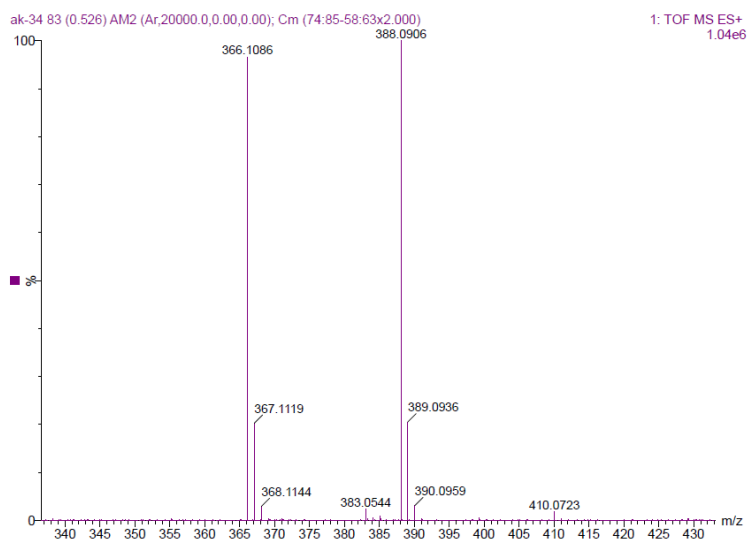

**Figure S75:** HRMS of compound **17**

**Table S1a.**  $^1\text{H}$  NMR Spectroscopic Data of **1–7** in DMSO- $d_6$  ( $\delta$  in ppm, J in Hz)

| No.             | 1                    | 1'            | 2             | 3                    | 4                     | 5              | 6                     | 6'                    | 7              | 7'             |
|-----------------|----------------------|---------------|---------------|----------------------|-----------------------|----------------|-----------------------|-----------------------|----------------|----------------|
| CH <sub>3</sub> | 3.84, s              | 3.73, s       |               |                      |                       |                |                       |                       |                |                |
| 2               | 7.33, d (1.9)        | 7.39, d (1.9) | 7.30, s       |                      |                       |                |                       |                       |                |                |
| 3               |                      |               |               | 7.21, d (4.0)        | 7.07, d (4)           | 7.06, d (3.9)  | 7.81, d (3.9)         | 7.79, d (3.9)         | 7.12, t (4.3)  | 7.12, t (4.3)  |
| 4               |                      |               |               | 7.79, d (4.0)        | 7.84 – 7.75, m        | 7.65, d (3.9)  | 7.41, d (4.0)         | 7.38, d (4.0)         | 7.76, d (4.0)  | 7.75, d (4.0)  |
| 5               | 7.12, dd (8.2) (1.9) | 7.07, d (1.9) | 6.84, m       |                      |                       |                |                       |                       |                |                |
| 6               | 6.86, d (8.1)        | 6.78, d (8.1) | 7.06, d (8.2) | 7.18 – 7.15, m       | 7.10, s               | 6.95, d (16.0) | 7.51, d (16.0)        | 7.44, d (15.5)        | 7.02 – 6.96, m | 7.11 – 7.03, m |
| 7               | 8.35, s              | 7.98, s       | 8.31, s       | 7.18 – 7.15, m       | 7.26, dd (16.0) (9.7) | 7.12 – 7.08, m | 7.26, dd (16.0) (9.6) | 6.88, dd (15.5) (9.7) | 7.11 – 7.03, m | 7.11 – 7.03, m |
| 8               | 11.88, s             | 9.77, s       |               | 8.27, dd (6.9) (1.9) | 8.28, d (9.7)         | 8.00, d (9.3)  | 8.59, d (9.6)         | 8.63, d (9.7)         | 7.83, d (9.3)  | 8.03 – 8.00, m |
| 9               |                      |               | 11.46, s      |                      |                       |                |                       |                       |                |                |
| 10              |                      |               |               | 12.20, s             | 12.21, s              |                |                       |                       | 11.70, s       | 11.42, s       |
| 12              | 7.84 – 7.78, m       | 7.68, m       | 7.79, d (8.3) |                      |                       |                |                       |                       | 3.98, s        | 3.63, s        |
| 13              | 8.81 – 8.75, m       | 8.73, m       | 6.84, m       | 7.85 – 7.80, m       |                       | 7.46, d (8.0)  | 4.35, s               | 4.23, s               |                |                |
| 14              |                      |               |               | 8.81 – 8.77, m       | 8.20, s               | 7.31, t (7.6)  |                       |                       | 7.22, d (2.4)  | 7.24, d (2.4)  |
| 15              | 8.81 – 8.75, m       | 8.73, m       | 6.84, m       |                      | 7.84 – 7.75, m        | 7.13, t (7.6)  |                       |                       | 10.93, s       | 10.89, s       |
| 16              | 7.84 – 7.78, m       | 7.68, m       |               | 8.81 – 8.77, m       | 7.84 – 7.75, m        | 7.74, d (7.8)  |                       |                       | 7.35, t (8.3)  | 7.35, t (8.3)  |
| 17              |                      |               |               | 7.85 – 7.80, m       | 7.84 – 7.75, m        |                |                       |                       | 7.11 – 7.03, m | 7.11 – 7.03, m |
| 18              |                      |               |               |                      | 8.31, d (7.9)         |                |                       |                       | 7.02 – 6.96, m | 7.02 – 6.96, m |
| 19              |                      |               | 7.79, d (8.3) |                      |                       |                |                       |                       | 7.54, d (7.9)  | 7.56, d (7.9)  |

**Table S1b.**  $^1\text{H}$  NMR Spectroscopic Data of **8–17** in DMSO- $d_6$  ( $\delta$  in ppm, J in Hz)

| No. | 8             | 9             | 10            | 11            | 12             | 12'            | 13            | 13'            | 14            | 14'           | 15            | 15'           | 16            | 17            | 17'           |
|-----|---------------|---------------|---------------|---------------|----------------|----------------|---------------|----------------|---------------|---------------|---------------|---------------|---------------|---------------|---------------|
| 3   | 7.21, d (3.6) | 7.28, d (3.7) | 7.01, d (3.7) | 7.58, d (3.8) | 7.12 – 7.07, m | 7.12 – 7.07, m | 6.99, d (3.6) | 7.23 – 7.19, m | 7.07, d (3.7) | 7.27, d (3.7) | 7.04, d (3.6) | 7.25, d (3.8) | 7.12, d (3.7) | 7.04, d (3.7) | 7.24, d (3.8) |

|    |                  |                   |                  |                  |                  |                   |                            |                            |                  |                  |                   |                   |                            |                   |                   |
|----|------------------|-------------------|------------------|------------------|------------------|-------------------|----------------------------|----------------------------|------------------|------------------|-------------------|-------------------|----------------------------|-------------------|-------------------|
| 4  | 7.50, d<br>(3.7) | 7.50, d<br>(3.7)  | 7.35, d<br>(3.7) | 7.62, d<br>(3.7) | 7.48, d<br>(3.7) | 7.45, d<br>(3.6)  | 7.45, d<br>(3.6)           | 7.55, d<br>(3.8)           | 7.47, d<br>(3.7) | 7.55, d<br>(3.7) | 7.45, d<br>(3.6)  | 7.55, d<br>(3.7)  | 7.49, d<br>(3.7)           | 7.46 –<br>7.39, m | 7.51, d<br>(3.7)  |
| 6  | 8.42, s          | 8.35, s           | 8.13, s          | 8.65, s          | 7.93, s          | 8.20, s           | 7.99, s                    | 7.41, s                    | 8.14, s          | 7.58, s          | 8.01, s           | 7.47, s           | 8.16, s                    | 7.98, s           | 7.98, s           |
| 8  | 12.19, s         | 12.15, s          |                  |                  | 11.42, s         | 11.67, s          | 11.31, s                   | 10.29, s                   | 11.98, s         | 10.93, s         | 11.41, s          | 10.36, s          | 12.40, s                   | 11.44, s          | 10.45, s          |
| 10 |                  |                   |                  |                  | 4.06, s          | 3.66, s           |                            |                            |                  |                  |                   |                   |                            |                   |                   |
| 11 | 7.83, d<br>(5.8) |                   | 7.73, d<br>(7.8) | 4.36, s          |                  |                   | 8.23, d<br>(2.4)           | 8.33, d<br>(2.4)           |                  |                  | 8.16 –<br>8.14, m | 8.25, s           |                            | 5.20, s           | 5.25, s           |
| 12 | 8.80, d<br>(5.8) | 8.19, s           | 7.12, t<br>(5.1) |                  | 7.28, d<br>(2.4) | 7.26, d<br>(2.4)  |                            |                            | 7.31, d<br>(4.9) | 7.41, d<br>(4.9) | 8.05 –<br>8.03, m | 8.16 –<br>8.14, m | 7.75, d<br>(2.1)           |                   |                   |
| 13 |                  | 7.74-<br>7.79, m  | 7.31, t<br>(7.1) |                  | 10.92, s         | 10.95, s          | 7.86, dd<br>(9.0)<br>(2.5) | 7.91, dd<br>(8.9)<br>(2.5) | 8.85, d<br>(4.9) | 8.90, d<br>(4.9) |                   |                   |                            | 7.46 –<br>7.39, m | 7.49 –<br>7.46, m |
| 14 | 8.80, d<br>(5.8) | 7.81, d<br>(7.3)  | 7.43, d<br>(7.9) | 8.12, d<br>(8.9) | 7.34, d<br>(8.3) | 7.36, d<br>(7.4)  | 7.23 –<br>7.19, m          | 7.27, d<br>(8.9)           |                  |                  | 8.63, s           | 8.64, s           | 7.28, dd<br>(8.4)<br>(2.0) | 7.46 –<br>7.39, m | 7.46 –<br>7.39, m |
| 15 | 7.83, d<br>(5.8) | 7.79-<br>7.74, m  |                  | 8.36, d<br>(8.9) | 7.05, t<br>(7.5) | 7.12 –<br>7.07, m |                            |                            |                  |                  |                   |                   | 7.42, d<br>(8.3)           | 7.38 –<br>7.34, m | 7.38 –<br>7.34, m |
| 16 |                  | 8.33 –<br>8.30, m |                  |                  | 6.94, t<br>(7.5) | 7.00, t<br>(7.3)  | 8.01, d<br>(9.0)           | 8.07, d<br>(8.7)           | 8.02, d<br>(8.9) | 8.08, d<br>(8.9) | 8.05 –<br>8.03, m | 8.08, d<br>(8.9)  |                            | 7.46 –<br>7.39, m | 7.46 –<br>7.39, m |
| 17 | 8.05, d<br>(8.8) |                   |                  | 8.36, d<br>(8.9) | 7.67, d<br>(7.9) | 7.58, d<br>(8.0)  | 8.31, d<br>(8.9)           | 8.36, d<br>(8.9)           | 8.32, d<br>(9.0) | 8.35, d<br>(8.9) | 8.31, d<br>(8.8)  | 8.36, d<br>(9.0)  |                            | 7.46 –<br>7.39, m | 7.49 –<br>7.46, m |
| 18 | 8.32, d<br>(8.9) |                   |                  | 8.12, d<br>(8.9) |                  |                   |                            |                            |                  |                  |                   |                   |                            |                   |                   |
| 19 |                  |                   | 8.01, d<br>(9.0) |                  |                  |                   | 8.31, d<br>(8.9)           | 8.36, d<br>(8.9)           | 8.32, d<br>(9.0) | 8.35, d<br>(8.9) | 8.31, d<br>(8.8)  | 8.36, d<br>(9.0)  |                            | 8.01, d<br>(8.5)  | 8.08 –<br>8.03, m |
| 20 | 8.32, d<br>(8.9) | 8.13, d<br>(8.5)  | 8.30, d<br>(8.9) |                  |                  |                   | 8.01, d<br>(9.0)           | 8.07, d<br>(8.7)           | 8.02, d<br>(8.9) | 8.08, d<br>(8.9) | 8.05 –<br>8.03, m | 8.08, d<br>(8.9)  | 8.04, d<br>(8.8)           | 8.35 –<br>8.28, m | 8.35 –<br>8.28, m |
| 21 | 8.05, d<br>(8.8) | 8.33 –<br>8.30, m |                  |                  | 8.05, d<br>(8.9) | 8.01, d<br>(8.8)  |                            |                            |                  |                  |                   |                   | 8.33, d,<br>(8.9)          |                   |                   |
| 22 |                  |                   | 8.30, d<br>(8.9) |                  | 8.33, d<br>(8.9) | 8.31, d<br>(8.9)  |                            |                            |                  |                  |                   |                   |                            | 8.35 –<br>8.28, m | 8.35 –<br>8.28, m |
| 23 |                  | 8.33 –<br>8.30, m | 8.01, d<br>(9.0) |                  |                  |                   |                            |                            |                  |                  |                   |                   | 8.33, d<br>(8.9)           | 8.01, d<br>(8.5)  | 8.08 –<br>8.03, m |
| 24 |                  | 8.13, d<br>(8.5)  |                  |                  | 8.33, d<br>(8.9) | 8.31, d<br>(8.9)  |                            |                            |                  |                  |                   |                   | 8.04, d<br>(8.8)           |                   |                   |
| 25 |                  |                   |                  |                  | 8.05, d<br>(8.9) | 8.01, d<br>(8.8)  |                            |                            |                  |                  |                   |                   |                            |                   |                   |

**Table S2a.** <sup>13</sup>C NMR Spectroscopic Data of **1–7** in DMSO-d<sub>6</sub> (δ in ppm)

| No.             | 1                      | 2                      | 3           | 4          | 5          | 6                      | 6'                     | 7                      | 7'                     |
|-----------------|------------------------|------------------------|-------------|------------|------------|------------------------|------------------------|------------------------|------------------------|
| CH <sub>3</sub> | 56.04, CH <sub>3</sub> | 55.99, CH <sub>3</sub> |             |            |            |                        |                        |                        |                        |
| 1               | 125.86 (1C)            | 126.36, C              |             |            |            |                        |                        |                        |                        |
| 2               | 109.56, CH             | 109.26, CH             | 155.21, C   | 155.70, C  | 155.73, C  | 153.80, C              | 153.42, C              | 155.33, C              | 155.40, C              |
| 3               | 149.77, C              | 148.49, C              | 114.21, CH  | 114.03, CH | 113.24, CH | 115.38, CH             | 115.25, CH             | 113.85, CH             | 113.85, CH             |
| 4               | 148.54, C              | 149.30, C              | 115.84, CH  | 116.10, CH | 115.48, CH | 116.51, CH             | 117.93, CH             | 115.88, CH             | 115.95, CH             |
| 5               | 115.94, CH             | 115.88, CH             | 151.91, C   | 151.78, C  | 151.86, C  | 152.47, C              | 152.77, C              | 151.77, C              | 151.77, C              |
| 6               | 122.90, CH             | 122.43, CH             | 125.20, CH  | 122.82, CH | 122.17, CH | 132.06, CH             | 132.45, CH             | 123.35, CH             | 123.97, CH             |
| 7               | 150.03, CH             | 147.86, CH             | 130.75, CH  | 132.21, CH | 130.92, CH | 127.87, CH             | 122.18, CH             | 130.84, CH             | 131.03, CH             |
| 8               |                        |                        | 149.55, C   | 153.35, CH | 145.46, CH | 169.97, CH             | 168.99, CH             | 143.60, CH             | 146.81, CH             |
| 10              | 161.77, C=O            | 162.99, C=O            |             |            |            |                        |                        |                        |                        |
| 11              | 141.16, C              | 124.51, C              | 162.17, C=O | 149.56, C  | 167.22, C  | 197.45, C=S            | 196.90, C=S            | 173.32, C=O            | 167.91, C=O            |
| 12              | 121.95, CH             | 130.01, CH             | 140.62, C   |            |            |                        |                        | 29.32, CH <sub>2</sub> | 31.16, CH <sub>2</sub> |
| 13              | 150.76, CH             | 115.45, CH             | 122.02, CH  |            | 118.04, CH | 35.23, CH <sub>2</sub> | 36.01, CH <sub>2</sub> | 108.24, C              | 108.32, C              |
| 14              |                        | 161.06, C              | 150.84, CH  | 139.07, CH | 126.45, CH | 170.03, C=O            | 169.62, C=O            | 124.56, CH             | 124.46, CH             |
